# Supplementary material
Source: Research Square preprint supplement (doi:10.21203/rs.3.rs-9384279/v1)
Supplement: Supplementary file 1 [file 166d6e93c9bd4772d2dc46f5.xlsx]

## Sheet: Sheet1
Table S7 qPCR Primer list
	Primer name	Primer sequence（5’-3’）
MS.gene051439	Ms4CL3--F	TGCACACTCCGGTGAATCC
	Ms4CL3--R	GCGTATGGAGTTGGGTGCTA
MS.gene004713	Ms4CL5--F	GTCCTGCGGTTTGTTTGCTG
	Ms4CL5--R	GCCACCGCAACATTAGTCAC
MS.gene24088	Ms4CL13--F	CCAACAACTCTGGCGTGCT
	Ms4CL13--R	GTGAAGGTGATGCTTGGGTG
