# Supplementary material
Source: Research Square preprint supplement (doi:10.21203/rs.3.rs-9384279/v1)
Supplement: Supplementary file 2 [file 1eaac452b22d1cb7e13a3fb9.xlsx]

## Sheet: Sheet1
Table S4 Ms4CLs gene expression in different tissues
Gene ID		Enlongated Stem	Flower	Leaf	Nodule	Pre-Enlongated Stem	Root
MS.gene98031	Ms4CL1	0.197618	0.125211	0	1.02701	0	3.43268
MS.gene27109	Ms4CL2	0.624502	0.334147	0.148733	0.256744	0	0.259275
MS.gene051439	Ms4CL3	0	0	0	2.64762	0	13.8391
MS.gene051440	Ms4CL4	0	0	0	1.40757	0	10.6056
MS.gene004713	Ms4CL5	3.17787	18.2145	11.1408	23.2392	4.1139	3.87781
MS.gene032245	Ms4CL6	0	0	0	0	0	0
MS.gene032243	Ms4CL7	0	0	0	0	0	0
MS.gene029771	Ms4CL8	0	0	0	0	0	0.517363
MS.gene029775	Ms4CL9	0.907697	2.95099	1.09109	12.0925	0.541214	14.9177
MS.gene029773	Ms4CL10	0	0	0	0	0	0
MS.gene029776	Ms4CL11	0	0	0	0	0	0
MS.gene32098	Ms4CL12	0.277862	1.14549	0.463334	1.68635	0	0.50778
MS.gene24088	Ms4CL13	0	0	0	0	0	0
MS.gene68419	Ms4CL14	0	0	0	0	0	0
MS.gene035028	Ms4CL15	1.4773	0.45551	0.301926	27.6293	0.19366	36.3915
MS.gene95463	Ms4CL16	0.0986115	0.221048	0.61566	0.722784	0.130043	0.25389
MS.gene88935	Ms4CL17	30.5058	15.6708	40.8669	21.5849	20.7333	26.9947
MS.gene68421	Ms4CL18	0	0	0	0	0	0
MS.gene005769	Ms4CL19	0.178244	0	0	0.0949047	0	0
MS.gene88987	Ms4CL20	5.11826	0.921708	2.77756	3.78899	7.14401	1.83226
MS.gene40027	Ms4CL21	3.21911	9.92631	5.76964	13.9129	4.96313	4.41893
MS.gene21415	Ms4CL22	0	0.112054	0	0	0	0
MS.gene028660	Ms4CL23	4.60488	18.8699	51.5846	5.82025	8.13827	12.6632
MS.gene43857	Ms4CL24	0.851035	1.45292	4.96237	0.83983	1.42875	0.762548
MS.gene43858	Ms4CL25	3.67898	9.49359	10.5537	2.44149	3.26701	2.61592
MS.gene31229	Ms4CL26	0	0	0.152589	0.100353	0.13197	0.179392
MS.gene31230	Ms4CL27	1.29137	2.93176	4.03507	0.993045	1.79932	1.73754
MS.gene98283	Ms4CL28	0	0	0.146355	0	0	0.0870197
MS.gene022444	Ms4CL29	0.710503	0.849603	2.27452	0.0962533	0	0.48427
MS.gene29781	Ms4CL30	1.78604	1.95573	6.93797	0.348894	1.24381	1.58505
MS.gene35477	Ms4CL31	0	0	0	0	0	0
MS.gene35476	Ms4CL32	0.0847921	0	0.599257	0	0.126578	0.172063
MS.gene09098	Ms4CL33	0.747034	1.56271	3.33824	1.1215	1.06678	0.465942
MS.gene09104	Ms4CL34	0.285492	0.258548	1.23869	0.199597	0.399803	0.166003
MS.gene09107	Ms4CL35	0.856087	0.99317	3.5144	0.436167	1.62584	0.321325
MS.gene049799	Ms4CL36	0	0.133998	0.192105	0	0	0
MS.gene049798	Ms4CL37	0.092986	0	0	0	0	0
MS.gene09153	Ms4CL38	0	0	0	0	0	0
MS.gene007715	Ms4CL39	0	0	0	0	0	0
MS.gene016573	Ms4CL40	0	0	0	0	0	0
MS.gene61077	Ms4CL41	0	0	0	0	0	0
MS.gene88460	Ms4CL42	0	0	0	0	0	0.0887538
MS.gene61755	Ms4CL43	0	0	0	0	0	0
