# Supplementary material
Source: Research Square preprint supplement (doi:10.21203/rs.3.rs-9384279/v1)
Supplement: Supplementary file 3 [file 2abb2d23b724a723e7480f2c.xlsx]

## Sheet: Sheet1
Table S1 Tandem duplication events involved in Ms4CLs.
Duplication events	Gene name1	Gene name 2	Chr Location for gene1	Chr Location for gene2
Tandem duplication event1	Ms4CL3	Ms4CL4	chr1.147712126-47715162	chr1.147741135-47745007
Tandem duplication event2	Ms4CL24	Ms4CL25	chr2.26260300-6264969	chr2.26275274-6280133
Tandem duplication event3	Ms4CL26	Ms4CL27	chr2.47118015-7122682	chr2.47133513-7137610
Tandem duplication event4	Ms4CL31	Ms4CL32	chr3.473563592-73574480	chr3.473577439-73583135
Tandem duplication event5	Ms4CL36	Ms4CL37	chr4.245978451-45982896	chr4.246006941-46011662

## Sheet: Sheet2
Ms4CL3
Ms4CL4
Ms4CL24
Ms4CL25
Ms4CL26
Ms4CL27
Ms4CL31
Ms4CL32
Ms4CL36
Ms4CL37

## Sheet: Sheet3
MS.gene051439.t1	chr1.147712126-47715162	Ms4CL3
MS.gene051440.t1	chr1.147741135-47745007	Ms4CL4
MS.gene43857.t1	chr2.26260300-6264969	Ms4CL24
MS.gene43858.t1	chr2.26275274-6280133	Ms4CL25
MS.gene31229.t1	chr2.47118015-7122682	Ms4CL26
MS.gene31230.t1	chr2.47133513-7137610	Ms4CL27
MS.gene35477.t1	chr3.473563592-73574480	Ms4CL31
MS.gene35476.t1	chr3.473577439-73583135	Ms4CL32
MS.gene049799.t1	chr4.245978451-45982896	Ms4CL36
MS.gene049798.t1	chr4.246006941-46011662	Ms4CL37
