# Supplementary material
Source: Research Square preprint supplement (doi:10.21203/rs.3.rs-9384279/v1)
Supplement: Supplementary file 4 [file b2bffd968cca83ef4185c9a7.xlsx]

## Sheet: Sheet1
Table S6 Ms4CLs gene expression under salt stress
Gene_ID		CK	S1	S2	S3	S4	S5	S6
MS.gene98031	Ms4CL1	4.37058	3.49402	2.7117	1.2903	1.23819	0.379139	1.29384
MS.gene27109	Ms4CL2	0	0	0	0	0	0	0
MS.gene051439	Ms4CL3	22.2614	17.1466	23.8607	12.3126	5.69967	7.14156	5.55329
MS.gene051440	Ms4CL4	51.3731	35.9226	37.1965	18.0067	13.1685	13.0027	19.9514
MS.gene004713	Ms4CL5	0.405128	0.666864	1.53275	4.98322	5.42752	5.00283	6.39642
MS.gene032245	Ms4CL6	0	0	0	0	0	0	0
MS.gene032243	Ms4CL7	0	0	0	0	0	0	0
MS.gene029771	Ms4CL8	0.410326	0.528845	0.127298	0.285261	0.28353	0.135365	0
MS.gene029775	Ms4CL9	23.3493	26.0234	28.2393	17.9381	9.66243	10.9128	14.5114
MS.gene029773	Ms4CL10	0	0	0.437606	0	0	0	0
MS.gene029776	Ms4CL11	0	0	0	0	0	0.135572	0
MS.gene32098	Ms4CL12	0.128899	0.258755	0.487229	3.59577	5.34564	2.15302	1.75840813000784
MS.gene24088	Ms4CL13	0	0.255595	1.63985	0.889976	0.399494	0.486017	0
MS.gene68419	Ms4CL14	0	0	0	0	0	0	0
MS.gene035028	Ms4CL15	57.7863	50.7314	54.3757	31.1329	20.6861	19.9498	20.3257
MS.gene95463	Ms4CL16	0.91836	0.791445	0.716314	4.50014	3.48507	2.77334	2.71573
MS.gene88935	Ms4CL17	7.43309	2.32485	15.4569	12.7949	7.77514	3.69877	0.96412
MS.gene68421	Ms4CL18	0	0	0	0	0	0	0
MS.gene005769	Ms4CL19	0	0	0	0	0	0	0
MS.gene88987	Ms4CL20	5.98035	3.20424	13.5073	10.6138	4.84589	1.63175	2.06429
MS.gene40027	Ms4CL21	5.83507	5.68257	11.2657	18.091	30.8079	19.693	22.4452
MS.gene21415	Ms4CL22	0	0	0	0	0	0	0.172996
MS.gene028660	Ms4CL23	36.3085	23.9431	31.5549	21.8415	26.1066	28.2286	21.7854
MS.gene43857	Ms4CL24	0.399779	0.270291	0.705167	0.490041	0.681849	1.00053	0.344675
MS.gene43858	Ms4CL25	0.139599	0.284147	0.217012	0.328089	1.121	0.335903	0.953491
MS.gene31229	Ms4CL26	1.57962	1.99674	1.38085	1.27827	1.72444	1.66465	1.57397
MS.gene31230	Ms4CL27	3.83757	6.38393	6.5576	5.26126	6.23922	5.98818	6.20071
MS.gene98283	Ms4CL28	0.259514	0.126107	2.29549	1.48726	0.819591	0.523631	0.941976
MS.gene022444	Ms4CL29	0	0.129624	0.512179	0.17515	0.378296	0.436022	0
MS.gene29781	Ms4CL30	0.759843	1.14727	3.98072	1.30324	0.977879	1.09378	0.93182
MS.gene35477	Ms4CL31	0	0	0	0	0	0.223203	0
MS.gene35476	Ms4CL32	0	0.126107	0.115026	0	0	0	0
MS.gene09098	Ms4CL33	1.05673	0.451989	0.228767	0.360988	0.607595	0.55591	0.372258
MS.gene09104	Ms4CL34	1.59187	1.97477	1.05173	0.124132	0.39223	0.139067	1.78513
MS.gene09107	Ms4CL35	1.63593	0.73466	1.10903	1.09126	0.792835	0.685437	0.901399
MS.gene049799	Ms4CL36	0	0	0	0	0	0	0
MS.gene049798	Ms4CL37	0	0	0	0	0	0.139067	0
MS.gene09153	Ms4CL38	0	0	0	0	0	0	0
MS.gene007715	Ms4CL39	0	0	0	0	0	0	0
MS.gene016573	Ms4CL40	0	0.129165	0	0.15334	0	0	0
MS.gene61077	Ms4CL41	0	0	0	0	0	0	0
MS.gene88460	Ms4CL42	0	0.132207	0.366379	0	0	0	0
MS.gene61755	Ms4CL43	0	0	0.194695	0	0	0	0
