# Supplementary material
Source: Research Square preprint supplement (doi:10.21203/rs.3.rs-9384279/v1)
Supplement: Supplementary file 5 [file caef94b0b437252a69c9597e.xlsx]

## Sheet: Sheet1
Table S2 Segmental duplication events involved in Ms4CLs.
Duplication events	Gene name1	Gene name 2	Chr Location for gene1	Chr Location for gene2
Segmental duplication event1	Ms4CL3	Ms4CL13	chr1.147712126-47715162	chr1.260938-64016
Segmental duplication event2	Ms4CL4	Ms4CL8	chr1.147741135-47745007	chr1.248165949-48173152
Segmental duplication event3	Ms4CL6	Ms4CL12	chr1.166251979-66254285	chr1.255821500-55826837
Segmental duplication event4	Ms4CL3	Ms4CL14	chr1.147712126-47715162	chr1.268019361-68021669
Segmental duplication event5	Ms4CL5	Ms4CL15	chr1.155144807-55150997	chr1.345587979-45602628
Segmental duplication event6	Ms4CL2	Ms4CL16	chr1.1135253-138331	chr1.352629427-52635128
Segmental duplication event7	Ms4CL6	Ms4CL17	chr1.166251979-66254285	chr1.354865-57948
Segmental duplication event8	Ms4CL6	Ms4CL18	chr1.166251979-66254285	chr1.363534484-63536790
Segmental duplication event9	Ms4CL5	Ms4CL22	chr1.155144807-55150997	chr1.471967508-71969814
Segmental duplication event10	Ms4CL2	Ms4CL21	chr1.1135253-138331	chr1.459775198-59782133
Segmental duplication event11	Ms4CL13	Ms4CL20	chr1.260938-64016	chr1.4462664-465742
Segmental duplication event12	Ms4CL8	Ms4CL17	chr1.248165949-48173152	chr1.354865-57948
Segmental duplication event13	Ms4CL12	Ms4CL15	chr1.255821500-55826837	chr1.345587979-45602628
Segmental duplication event14	Ms4CL14	Ms4CL16	chr1.268019361-68021669	chr1.352629427-52635128
Segmental duplication event15	Ms4CL12	Ms4CL18	chr1.255821500-55826837	chr1.363534484-63536790
Segmental duplication event16	Ms4CL14	Ms4CL21	chr1.268019361-68021669	chr1.459775198-59782133
Segmental duplication event17	Ms4CL13	Ms4CL22	chr1.260938-64016	chr1.471967508-71969814
Segmental duplication event18	Ms4CL18	Ms4CL20	chr1.363534484-63536790	chr1.4462664-465742
Segmental duplication event19	Ms4CL16	Ms4CL22	chr1.352629427-52635128	chr1.471967508-71969814
Segmental duplication event20	Ms4CL17	Ms4CL21	chr1.354865-57948	chr1.459775198-59782133
Segmental duplication event21	Ms4CL23	Ms4CL20	chr2.17999944-8004267	chr1.4462664-465742
Segmental duplication event22	Ms4CL23	Ms4CL24	chr2.17999944-8004267	chr2.26260300-6264969
Segmental duplication event23	Ms4CL24	Ms4CL26	chr2.26260300-6264969	chr2.47118015-7122682
Segmental duplication event24	Ms4CL28	Ms4CL26	chr3.161512018-61517425	chr2.47118015-7122682
Segmental duplication event25	Ms4CL28	Ms4CL29	chr3.161512018-61517425	chr3.267600791-67607624
Segmental duplication event26	Ms4CL38	Ms4CL39	chr4.343371506-43374762	chr4.445661522-45664778
Segmental duplication event27	Ms4CL40	Ms4CL39	chr8.164342047-64346426	chr4.445661522-45664778
Segmental duplication event28	Ms4CL40	Ms4CL41	chr8.164342047-64346426	chr8.260542431-60546713
Segmental duplication event29	Ms4CL40	Ms4CL42	chr8.164342047-64346426	chr8.357778400-57782757
Segmental duplication event30	Ms4CL41	Ms4CL43	chr8.260542431-60546713	chr8.458607134-58611518
Segmental duplication event31	Ms4CL41	Ms4CL42	chr8.260542431-60546713	chr8.357778400-57782757
Segmental duplication event32	Ms4CL42	Ms4CL43	chr8.357778400-57782757	chr8.458607134-58611518
