# Supplementary material
Source: Research Square preprint supplement (doi:10.21203/rs.3.rs-9384279/v1)
Supplement: Supplementary file 6 [file d958300814cf320ee1986be5.xlsx]

## Sheet: Sheet1
Table S5 Ms4CLs gene expression under drought stress
Gene_ID		CK	M1	M2	M3	M4	M5
MS.gene98031	Ms4CL1	4.37058	3.6819	3.83054	1.76104	1.17534	0.509743
MS.gene27109	Ms4CL2	0	0	0	0	0	0
MS.gene051439	Ms4CL3	22.2614	20.0388	13.3978	6.20124	6.99551	3.88544
MS.gene051440	Ms4CL4	51.3731	38.1045	19.9596	16.7279	16.3862	17.2482
MS.gene004713	Ms4CL5	0.405128	1.50105	3.90632	5.02884	7.0864	6.62651
MS.gene032245	Ms4CL6	0	0	0	0	0	0
MS.gene032243	Ms4CL7	0	0	0	0	0	0
MS.gene029771	Ms4CL8	0.410326	0.250446	0	0.12913	0.152145	0
MS.gene029775	Ms4CL9	23.3493	29.9683	23.0286	13.4682	11.4798	14.8313
MS.gene029773	Ms4CL10	0	0.12162	0	0	0	0.130541
MS.gene029776	Ms4CL11	0	0.121401	0.235559	0.122818	0	0
MS.gene32098	Ms4CL12	0.128899	0.372571	4.77817	2.89049	1.49727	2.64152
MS.gene24088	Ms4CL13	0	1.20735	1.78627	0.358849	0.342608	0.131012
MS.gene68419	Ms4CL14	0	0	0	0	0	0
MS.gene035028	Ms4CL15	57.7863	44.8147	35.8875	22.4046	24.5625	23.4934
MS.gene95463	Ms4CL16	0.91836	0.237714	4.07131	2.43115	3.69366	2.69414
MS.gene88935	Ms4CL17	7.43309	16.301	15.2428	3.88246	2.77048	1.6151
MS.gene68421	Ms4CL18	0	0	0	0	0	0
MS.gene005769	Ms4CL19	0	0	0	0	0	0
MS.gene88987	Ms4CL20	5.98035	22.8062	19.3334	1.62197	2.32091	1.33115
MS.gene40027	Ms4CL21	5.83507	5.23863	23.0209	26.0663	32.4431	33.0302
MS.gene21415	Ms4CL22	0	0	0	0	0	0
MS.gene028660	Ms4CL23	36.3085	21.2767	25.1476	27.7113	25.0168	28.6874
MS.gene43857	Ms4CL24	0.399779	0.744787	0.885337	0.566576	0.767261	0.669746
MS.gene43858	Ms4CL25	0.139599	0.534803	0.516958	0.39289	0.315623	1.0003
MS.gene31229	Ms4CL26	1.57962	1.22944	1.19329	2.53158	0.591502	0.563807
MS.gene31230	Ms4CL27	3.83757	5.27958	4.6919	8.91491	8.04854	5.10327
MS.gene98283	Ms4CL28	0.259514	0.60541	2.06444	0.298065	0.483061	0.308043
MS.gene022444	Ms4CL29	0	0.473918	0.126134	0.176556	0.199393	0.128918
MS.gene29781	Ms4CL30	0.759843	2.12938	1.37292	1.92835	2.43793	1.18256
MS.gene35477	Ms4CL31	0	0.150078	0.302318	0	0.189305	0
MS.gene35476	Ms4CL32	0	0	0	0	0.137739	0
MS.gene09098	Ms4CL33	1.05673	0.420171	0	0.930691	0.342326	0.844382
MS.gene09104	Ms4CL34	1.59187	0.505349	0.724896	0.382818	0.436929	1.57154
MS.gene09107	Ms4CL35	1.63593	0.807006	0.651782	0.640963	0.40765	0.398411
MS.gene049799	Ms4CL36	0	0	0	0	0	0
MS.gene049798	Ms4CL37	0	0	0	0	0	0
MS.gene09153	Ms4CL38	0	0	0	0	0	0
MS.gene007715	Ms4CL39	0	0	0	0	0	0
MS.gene016573	Ms4CL40	0	0	0	0	0	0
MS.gene61077	Ms4CL41	0	0	0	0	0	0
MS.gene88460	Ms4CL42	0	0	0	0	0.148838	0
MS.gene61755	Ms4CL43	0	0	0	0	0	0
