# Supplementary material
Source: Research Square preprint supplement (doi:10.21203/rs.3.rs-9384279/v1)
Supplement: Supplementary file 7 [file fdb26f5beea8bd63c5d72ecf.xlsx]

## Sheet: Sheet1
Table S3 Homeopathic action element predicts results about Ms4CLs.
Gene ID	Cis-acting element ID	Cis-acting element base sequence	Starting position	Cis-acting element base sequence length	Source of information	A brief note on the role of cis-acting elements
MS.gene004713.t1	AE-box	AGAAACAA	37	8	Arabidopsis thaliana	light responsive
MS.gene004713.t1	TGA-element	AACGAC	678	6	Brassica oleracea	plant growth regulators
MS.gene004713.t1	ARE	AAACCA	49	6	Zea mays	anaerobic induction
MS.gene004713.t1	ARE	AAACCA	1528	6	Zea mays	anaerobic induction
MS.gene004713.t1	Box 4	ATTAAT	1128	6	Petroselinum crispum	drought responsive
MS.gene004713.t1	Box 4	ATTAAT	1243	6	Petroselinum crispum	drought responsive
MS.gene004713.t1	Box 4	ATTAAT	1325	6	Petroselinum crispum	drought responsive
MS.gene004713.t1	G-box	CACGAC	1316	6	Zea mays	light responsive
MS.gene004713.t1	G-box	CACGAC	1486	6	Zea mays	light responsive
MS.gene004713.t1	G-box	TACGTG	1738	6	Arabidopsis thaliana	light responsive
MS.gene004713.t1	ABRE	GACACGTGGC	336	9	Triticum aestivum	plant growth regulators
MS.gene004713.t1	ABRE	TACGTGTC	1738	8	Oryza sativa	plant growth regulators
MS.gene004713.t1	ABRE	ACGTG	1739	5	Arabidopsis thaliana	plant growth regulators
MS.gene004713.t1	TCA-element	CCATCTTTTT	227	9	Nicotiana tabacum	salicylic acid responsive
MS.gene004713.t1	TC-rich repeats	ATTCTCTAAC	164	9	Nicotiana tabacum	involvement in defense and stress response
MS.gene004713.t1	LTR	CCGAAA	1885	6	Hordeum vulgare	low temperature responsive
MS.gene004713.t1	ATCT-motif	AATCTAATCC	125	9	Pisum sativum	drought responsive
MS.gene004713.t1	P-box	CCTTTTG	880	7	Oryza sativa	plant growth regulators
MS.gene004713.t1	GT1-motif	GGTTAA	1042	6	Arabidopsis thaliana	light responsive
MS.gene004713.t1	GT1-motif	GGTTAA	1177	6	Arabidopsis thaliana	light responsive
MS.gene005769.t1	ATCT-motif	AATCTAATCC	400	9	Pisum sativum	drought responsive
MS.gene005769.t1	ATCT-motif	AATCTAATCC	435	9	Pisum sativum	drought responsive
MS.gene005769.t1	TC-rich repeats	ATTCTCTAAC	169	9	Nicotiana tabacum	involvement in defense and stress response
MS.gene005769.t1	CGTCA-motif	CGTCA	76	5	Hordeum vulgare	MeJA responsive
MS.gene005769.t1	CGTCA-motif	CGTCA	1776	5	Hordeum vulgare	MeJA responsive
MS.gene005769.t1	TGACG-motif	TGACG	76	5	Hordeum vulgare	MeJA responsive
MS.gene005769.t1	TGACG-motif	TGACG	1776	5	Hordeum vulgare	MeJA responsive
MS.gene005769.t1	TCT-motif	TCTTAC	505	6	Arabidopsis thaliana	drought responsive
MS.gene005769.t1	TCT-motif	TCTTAC	1851	6	Arabidopsis thaliana	drought responsive
MS.gene005769.t1	TCA-element	CCATCTTTTT	28	9	Nicotiana tabacum	salicylic acid responsive
MS.gene005769.t1	MBS	CAACTG	1845	6	Arabidopsis thaliana	drought responsive
MS.gene005769.t1	MBS	CAACTG	1867	6	Arabidopsis thaliana	drought responsive
MS.gene005769.t1	ABRE	ACGTG	78	5	Arabidopsis thaliana	plant growth regulators
MS.gene005769.t1	ABRE	CGTACGTGCA	1491	9	Hordeum vulgare	plant growth regulators
MS.gene005769.t1	GARE-motif	TCTGTTG	1534	7	Brassica oleracea	plant growth regulators
MS.gene005769.t1	G-box	CACGTC	77	6	Zea mays	light responsive
MS.gene005769.t1	G-box	CACGAC	1102	6	Zea mays	light responsive
MS.gene005769.t1	ARE	AAACCA	281	6	Zea mays	anaerobic induction
MS.gene005769.t1	ARE	AAACCA	379	6	Zea mays	anaerobic induction
MS.gene005769.t1	Box 4	ATTAAT	953	6	Petroselinum crispum	drought responsive
MS.gene005769.t1	MRE	AACCTAA	735	7	Petroselinum crispum	drought responsive
MS.gene005769.t1	MRE	AACCTAA	801	7	Petroselinum crispum	drought responsive
MS.gene005769.t1	AE-box	AGAAACTT	1526	8	Arabidopsis thaliana	light responsive
MS.gene007715.t1	I-box	gGATAAGGTG	1929	9	Zea mays	drought responsive
MS.gene007715.t1	I-box	cCATATCCAAT	1931	10	Flaveria trinervia	drought responsive
MS.gene007715.t1	MRE	AACCTAA	535	7	Petroselinum crispum	drought responsive
MS.gene007715.t1	ABRE	TACGTGTC	1219	8	Oryza sativa	plant growth regulators
MS.gene007715.t1	ABRE	ACGTG	1221	5	Arabidopsis thaliana	plant growth regulators
MS.gene007715.t1	ABRE	ACGTG	1531	5	Arabidopsis thaliana	plant growth regulators
MS.gene007715.t1	TCA-element	CCATCTTTTT	138	9	Nicotiana tabacum	salicylic acid responsive
MS.gene007715.t1	Box 4	ATTAAT	1299	6	Petroselinum crispum	drought responsive
MS.gene007715.t1	Box 4	ATTAAT	1712	6	Petroselinum crispum	drought responsive
MS.gene007715.t1	ARE	AAACCA	419	6	Zea mays	anaerobic induction
MS.gene007715.t1	ARE	AAACCA	919	6	Zea mays	anaerobic induction
MS.gene007715.t1	ARE	AAACCA	1905	6	Zea mays	anaerobic induction
MS.gene007715.t1	G-box	TAACACGTAG	1076	9	Brassica oleracea	light responsive
MS.gene007715.t1	G-box	TACGTG	1221	6	Arabidopsis thaliana	light responsive
MS.gene007715.t1	G-box	TACGTG	1531	6	Arabidopsis thaliana	light responsive
MS.gene007715.t1	GATA-motif	GATAGGA	342	7	Arabidopsis thaliana	drought responsive
MS.gene007715.t1	TCT-motif	TCTTAC	840	6	Arabidopsis thaliana	drought responsive
MS.gene007715.t1	CGTCA-motif	CGTCA	150	5	Hordeum vulgare	MeJA responsive
MS.gene007715.t1	TGACG-motif	TGACG	150	5	Hordeum vulgare	MeJA responsive
MS.gene007715.t1	TC-rich repeats	GTTTTCTTAC	1465	9	Nicotiana tabacum	involvement in defense and stress response
MS.gene016573.t1	Box 4	ATTAAT	402	6	Petroselinum crispum	drought responsive
MS.gene016573.t1	Box 4	ATTAAT	1806	6	Petroselinum crispum	drought responsive
MS.gene016573.t1	ARE	AAACCA	832	6	Zea mays	anaerobic induction
MS.gene016573.t1	ARE	AAACCA	1708	6	Zea mays	anaerobic induction
MS.gene016573.t1	ARE	AAACCA	1733	6	Zea mays	anaerobic induction
MS.gene016573.t1	G-box	ACACGTGT	1160	8	Brassica napus	light responsive
MS.gene016573.t1	G-box	CACGTG	1161	6	Arabidopsis thaliana	light responsive
MS.gene016573.t1	ABRE	ACGTG	630	5	Arabidopsis thaliana	plant growth regulators
MS.gene016573.t1	ABRE	CACGTG	1161	6	Arabidopsis thaliana	plant growth regulators
MS.gene016573.t1	ABRE	ACGTG	1162	5	Arabidopsis thaliana	plant growth regulators
MS.gene016573.t1	LTR	CCGAAA	1246	6	Hordeum vulgare	low temperature responsive
MS.gene016573.t1	LTR	CCGAAA	1597	6	Hordeum vulgare	low temperature responsive
MS.gene016573.t1	G-Box	CACGTT	629	6	Pisum sativum	light responsive
MS.gene016573.t1	G-Box	CACGTG	1161	6	Pisum sativum	light responsive
MS.gene016573.t1	TC-rich repeats	ATTCTCTAAC	459	9	Nicotiana tabacum	involvement in defense and stress response
MS.gene016573.t1	GT1-motif	GGTTAA	33	6	Arabidopsis thaliana	light responsive
MS.gene016573.t1	GT1-motif	GGTTAA	1635	6	Arabidopsis thaliana	light responsive
MS.gene016573.t1	GATA-motif	AAGGATAAGG	616	9	Solanum tuberosum	drought responsive
MS.gene022444.t1	MBS	CAACTG	277	6	Arabidopsis thaliana	drought responsive
MS.gene022444.t1	MBS	CAACTG	923	6	Arabidopsis thaliana	drought responsive
MS.gene022444.t1	ABRE	ACGTG	714	5	Arabidopsis thaliana	plant growth regulators
MS.gene022444.t1	ABRE	CACGTG	1728	6	Arabidopsis thaliana	plant growth regulators
MS.gene022444.t1	ABRE	ACGTG	1729	5	Arabidopsis thaliana	plant growth regulators
MS.gene022444.t1	G-box	TACGTG	713	6	Arabidopsis thaliana	light responsive
MS.gene022444.t1	G-box	CACGTG	1728	6	Arabidopsis thaliana	light responsive
MS.gene022444.t1	ARE	AAACCA	1408	6	Zea mays	anaerobic induction
MS.gene022444.t1	Box 4	ATTAAT	1241	6	Petroselinum crispum	drought responsive
MS.gene022444.t1	Box 4	ATTAAT	1276	6	Petroselinum crispum	drought responsive
MS.gene022444.t1	Box 4	ATTAAT	1487	6	Petroselinum crispum	drought responsive
MS.gene022444.t1	Box 4	ATTAAT	1529	6	Petroselinum crispum	drought responsive
MS.gene022444.t1	AE-box	AGAAACAA	912	8	Arabidopsis thaliana	light responsive
MS.gene022444.t1	AE-box	AGAAACAA	1172	8	Arabidopsis thaliana	light responsive
MS.gene022444.t1	P-box	CCTTTTG	999	7	Oryza sativa	plant growth regulators
MS.gene022444.t1	TGACG-motif	TGACG	679	5	Hordeum vulgare	MeJA responsive
MS.gene022444.t1	CGTCA-motif	CGTCA	679	5	Hordeum vulgare	MeJA responsive
MS.gene022444.t1	G-Box	CACGTG	1728	6	Pisum sativum	light responsive
MS.gene022444.t1	GATA-motif	GATAGGG	1045	7	Pisum sativum	drought responsive
MS.gene028660.t1	ABRE	ACGTG	282	5	Arabidopsis thaliana	plant growth regulators
MS.gene028660.t1	G-box	TACGTG	281	6	Arabidopsis thaliana	light responsive
MS.gene028660.t1	GARE-motif	TCTGTTG	399	7	Brassica oleracea	plant growth regulators
MS.gene028660.t1	Box 4	ATTAAT	473	6	Petroselinum crispum	drought responsive
MS.gene028660.t1	Box 4	ATTAAT	1659	6	Petroselinum crispum	drought responsive
MS.gene028660.t1	Box 4	ATTAAT	1896	6	Petroselinum crispum	drought responsive
MS.gene028660.t1	ARE	AAACCA	644	6	Zea mays	anaerobic induction
MS.gene028660.t1	ARE	AAACCA	668	6	Zea mays	anaerobic induction
MS.gene028660.t1	ARE	AAACCA	698	6	Zea mays	anaerobic induction
MS.gene028660.t1	ARE	AAACCA	1983	6	Zea mays	anaerobic induction
MS.gene028660.t1	TCT-motif	TCTTAC	293	6	Arabidopsis thaliana	drought responsive
MS.gene028660.t1	TCT-motif	TCTTAC	1653	6	Arabidopsis thaliana	drought responsive
MS.gene029771.t1	TCT-motif	TCTTAC	563	6	Arabidopsis thaliana	drought responsive
MS.gene029771.t1	GATA-motif	AAGATAAGATT	1665	10	Arabidopsis thaliana	drought responsive
MS.gene029771.t1	GATA-motif	GATAGGA	1739	7	Arabidopsis thaliana	drought responsive
MS.gene029771.t1	GT1-motif	GGTTAAT	37	7	Avena sativa	light responsive
MS.gene029771.t1	GT1-motif	GGTTAA	38	6	Arabidopsis thaliana	light responsive
MS.gene029771.t1	GT1-motif	GGTTAA	79	6	Arabidopsis thaliana	light responsive
MS.gene029771.t1	TGACG-motif	TGACG	1354	5	Hordeum vulgare	MeJA responsive
MS.gene029771.t1	G-Box	CACGTT	656	6	Pisum sativum	light responsive
MS.gene029771.t1	CGTCA-motif	CGTCA	1354	5	Hordeum vulgare	MeJA responsive
MS.gene029771.t1	MRE	AACCTAA	28	7	Petroselinum crispum	drought responsive
MS.gene029771.t1	ABRE	ACGTG	656	5	Arabidopsis thaliana	plant growth regulators
MS.gene029771.t1	ABRE	ACGTG	1848	5	Arabidopsis thaliana	plant growth regulators
MS.gene029771.t1	G-box	TACGTG	1847	6	Arabidopsis thaliana	light responsive
MS.gene029771.t1	Box 4	ATTAAT	1183	6	Petroselinum crispum	drought responsive
MS.gene029771.t1	Box 4	ATTAAT	1373	6	Petroselinum crispum	drought responsive
MS.gene029771.t1	Box 4	ATTAAT	1705	6	Petroselinum crispum	drought responsive
MS.gene029771.t1	ARE	AAACCA	486	6	Zea mays	anaerobic induction
MS.gene029771.t1	ARE	AAACCA	1453	6	Zea mays	anaerobic induction
MS.gene029771.t1	ARE	AAACCA	1947	6	Zea mays	anaerobic induction
MS.gene029773.t1	AE-box	AGAAACAA	1515	8	Arabidopsis thaliana	light responsive
MS.gene029773.t1	I-box	AGATAAGG	359	8	Triticum aestivum	drought responsive
MS.gene029773.t1	G-box	CACGAC	919	6	Zea mays	light responsive
MS.gene029773.t1	G-box	TAAACGTG	1667	8	Brassica oleracea	light responsive
MS.gene029773.t1	Box 4	ATTAAT	807	6	Petroselinum crispum	drought responsive
MS.gene029773.t1	Box 4	ATTAAT	1058	6	Petroselinum crispum	drought responsive
MS.gene029773.t1	Box 4	ATTAAT	1229	6	Petroselinum crispum	drought responsive
MS.gene029773.t1	Box 4	ATTAAT	1274	6	Petroselinum crispum	drought responsive
MS.gene029773.t1	Box 4	ATTAAT	1353	6	Petroselinum crispum	drought responsive
MS.gene029773.t1	Box 4	ATTAAT	1810	6	Petroselinum crispum	drought responsive
MS.gene029773.t1	ARE	AAACCA	46	6	Zea mays	anaerobic induction
MS.gene029773.t1	ARE	AAACCA	384	6	Zea mays	anaerobic induction
MS.gene029773.t1	ARE	AAACCA	1904	6	Zea mays	anaerobic induction
MS.gene029773.t1	ABRE	TACGGTC	1629	7	Arabidopsis thaliana	plant growth regulators
MS.gene029773.t1	ABRE	ACGTG	1667	5	Arabidopsis thaliana	plant growth regulators
MS.gene029773.t1	TCT-motif	TCTTAC	157	6	Arabidopsis thaliana	drought responsive
MS.gene029773.t1	TCT-motif	TCTTAC	166	6	Arabidopsis thaliana	drought responsive
MS.gene029773.t1	GATA-motif	AAGGATAAGG	1379	9	Solanum tuberosum	drought responsive
MS.gene029773.t1	TGACG-motif	TGACG	911	5	Hordeum vulgare	MeJA responsive
MS.gene029773.t1	G-Box	TCCACATGGCA	1649	10	Triticum aestivum	light responsive
MS.gene029773.t1	G-Box	CACGTT	1667	6	Pisum sativum	light responsive
MS.gene029773.t1	CGTCA-motif	CGTCA	911	5	Hordeum vulgare	MeJA responsive
MS.gene029773.t1	GT1-motif	GGTTAA	519	6	Arabidopsis thaliana	light responsive
MS.gene029775.t1	MBS	CAACTG	1316	6	Arabidopsis thaliana	drought responsive
MS.gene029775.t1	ABRE	ACGTG	1307	5	Arabidopsis thaliana	plant growth regulators
MS.gene029775.t1	G-box	TACGTG	1307	6	Arabidopsis thaliana	light responsive
MS.gene029775.t1	TGA-element	AACGAC	146	6	Brassica oleracea	plant growth regulators
MS.gene029775.t1	TGA-element	AACGAC	1203	6	Brassica oleracea	plant growth regulators
MS.gene029775.t1	TCT-motif	TCTTAC	1451	6	Arabidopsis thaliana	drought responsive
MS.gene029775.t1	GATA-motif	AAGGATAAGG	222	9	Solanum tuberosum	drought responsive
MS.gene029775.t1	GATA-motif	GATAGGA	1390	7	Arabidopsis thaliana	drought responsive
MS.gene029775.t1	GT1-motif	GGTTAA	224	6	Arabidopsis thaliana	light responsive
MS.gene029775.t1	GT1-motif	GCGGTAATT	610	9	Oryza sativa	light responsive
MS.gene029775.t1	GT1-motif	GCGGTAATT	1792	9	Oryza sativa	light responsive
MS.gene029775.t1	TC-rich repeats	GTTTTCTTAC	480	9	Nicotiana tabacum	involvement in defense and stress response
MS.gene029775.t1	TC-rich repeats	GTTTTCTTAC	1922	9	Nicotiana tabacum	involvement in defense and stress response
MS.gene029775.t1	TGACG-motif	TGACG	151	5	Hordeum vulgare	MeJA responsive
MS.gene029775.t1	TGACG-motif	TGACG	358	5	Hordeum vulgare	MeJA responsive
MS.gene029775.t1	TGACG-motif	TGACG	1240	5	Hordeum vulgare	MeJA responsive
MS.gene029775.t1	CGTCA-motif	CGTCA	151	5	Hordeum vulgare	MeJA responsive
MS.gene029775.t1	CGTCA-motif	CGTCA	358	5	Hordeum vulgare	MeJA responsive
MS.gene029775.t1	CGTCA-motif	CGTCA	1240	5	Hordeum vulgare	MeJA responsive
MS.gene029776.t1	MBS	CAACTG	1316	6	Arabidopsis thaliana	drought responsive
MS.gene029776.t1	ABRE	ACGTG	97	5	Arabidopsis thaliana	plant growth regulators
MS.gene029776.t1	ABRE	ACGTG	1307	5	Arabidopsis thaliana	plant growth regulators
MS.gene029776.t1	G-box	CACGTC	96	6	Zea mays	light responsive
MS.gene029776.t1	G-box	TACGTG	1307	6	Arabidopsis thaliana	light responsive
MS.gene029776.t1	Box 4	ATTAAT	477	6	Petroselinum crispum	drought responsive
MS.gene029776.t1	Box 4	ATTAAT	847	6	Petroselinum crispum	drought responsive
MS.gene029776.t1	Box 4	ATTAAT	919	6	Petroselinum crispum	drought responsive
MS.gene029776.t1	Box 4	ATTAAT	946	6	Petroselinum crispum	drought responsive
MS.gene029776.t1	TGA-element	AACGAC	1203	6	Brassica oleracea	plant growth regulators
MS.gene029776.t1	TCT-motif	TCTTAC	899	6	Arabidopsis thaliana	drought responsive
MS.gene029776.t1	TCT-motif	TCTTAC	1451	6	Arabidopsis thaliana	drought responsive
MS.gene029776.t1	GATA-motif	GATAGGG	728	7	Pisum sativum	drought responsive
MS.gene029776.t1	GATA-motif	GATAGGA	1390	7	Arabidopsis thaliana	drought responsive
MS.gene029776.t1	GT1-motif	GGTTAAT	34	7	Avena sativa	light responsive
MS.gene029776.t1	GT1-motif	GGTTAA	35	6	Arabidopsis thaliana	light responsive
MS.gene029776.t1	GT1-motif	GCGGTAATT	1792	9	Oryza sativa	light responsive
MS.gene029776.t1	ATCT-motif	AATCTAATCC	470	9	Pisum sativum	drought responsive
MS.gene029776.t1	TC-rich repeats	ATTCTCTAAC	440	9	Nicotiana tabacum	involvement in defense and stress response
MS.gene029776.t1	TC-rich repeats	GTTTTCTTAC	1922	9	Nicotiana tabacum	involvement in defense and stress response
MS.gene029776.t1	CGTCA-motif	CGTCA	1240	5	Hordeum vulgare	MeJA responsive
MS.gene029776.t1	TGACG-motif	TGACG	1240	5	Hordeum vulgare	MeJA responsive
MS.gene032243.t1	MBS	CAACTG	1862	6	Arabidopsis thaliana	drought responsive
MS.gene032243.t1	ABRE	CGTACGTGCA	1479	9	Hordeum vulgare	plant growth regulators
MS.gene032243.t1	GARE-motif	TCTGTTG	1522	7	Brassica oleracea	plant growth regulators
MS.gene032243.t1	Box 4	ATTAAT	1154	6	Petroselinum crispum	drought responsive
MS.gene032243.t1	AE-box	AGAAACTT	1514	8	Arabidopsis thaliana	light responsive
MS.gene032243.t1	GT1-motif	GGTTAA	1844	6	Arabidopsis thaliana	light responsive
MS.gene032243.t1	ATCT-motif	AATCTAATCC	469	9	Pisum sativum	drought responsive
MS.gene032243.t1	TGACG-motif	TGACG	1300	5	Hordeum vulgare	MeJA responsive
MS.gene032243.t1	TGACG-motif	TGACG	1758	5	Hordeum vulgare	MeJA responsive
MS.gene032243.t1	CGTCA-motif	CGTCA	1300	5	Hordeum vulgare	MeJA responsive
MS.gene032243.t1	CGTCA-motif	CGTCA	1758	5	Hordeum vulgare	MeJA responsive
MS.gene032243.t1	TCT-motif	TCTTAC	539	6	Arabidopsis thaliana	drought responsive
MS.gene032243.t1	TCT-motif	TCTTAC	1833	6	Arabidopsis thaliana	drought responsive
MS.gene032245.t1	GT1-motif	GGTTAA	1843	6	Arabidopsis thaliana	light responsive
MS.gene032245.t1	ATCT-motif	AATCTAATCC	468	9	Pisum sativum	drought responsive
MS.gene032245.t1	CGTCA-motif	CGTCA	1299	5	Hordeum vulgare	MeJA responsive
MS.gene032245.t1	CGTCA-motif	CGTCA	1757	5	Hordeum vulgare	MeJA responsive
MS.gene032245.t1	TGACG-motif	TGACG	1299	5	Hordeum vulgare	MeJA responsive
MS.gene032245.t1	TGACG-motif	TGACG	1757	5	Hordeum vulgare	MeJA responsive
MS.gene032245.t1	TCT-motif	TCTTAC	538	6	Arabidopsis thaliana	drought responsive
MS.gene032245.t1	TCT-motif	TCTTAC	1832	6	Arabidopsis thaliana	drought responsive
MS.gene032245.t1	ABRE	CGTACGTGCA	1478	9	Hordeum vulgare	plant growth regulators
MS.gene032245.t1	MBS	CAACTG	1861	6	Arabidopsis thaliana	drought responsive
MS.gene032245.t1	Box 4	ATTAAT	1153	6	Petroselinum crispum	drought responsive
MS.gene032245.t1	GARE-motif	TCTGTTG	1521	7	Brassica oleracea	plant growth regulators
MS.gene032245.t1	AE-box	AGAAACTT	1513	8	Arabidopsis thaliana	light responsive
MS.gene035028.t1	TCT-motif	TCTTAC	447	6	Arabidopsis thaliana	drought responsive
MS.gene035028.t1	TCT-motif	TCTTAC	1628	6	Arabidopsis thaliana	drought responsive
MS.gene035028.t1	GATA-motif	GATAGGA	1743	7	Arabidopsis thaliana	drought responsive
MS.gene035028.t1	P-box	CCTTTTG	1244	7	Oryza sativa	plant growth regulators
MS.gene035028.t1	G-Box	CACGTT	541	6	Pisum sativum	light responsive
MS.gene035028.t1	G-Box	CACGTT	1524	6	Pisum sativum	light responsive
MS.gene035028.t1	G-Box	CACGTT	1847	6	Pisum sativum	light responsive
MS.gene035028.t1	CGTCA-motif	CGTCA	1241	5	Hordeum vulgare	MeJA responsive
MS.gene035028.t1	CGTCA-motif	CGTCA	1514	5	Hordeum vulgare	MeJA responsive
MS.gene035028.t1	TGACG-motif	TGACG	1241	5	Hordeum vulgare	MeJA responsive
MS.gene035028.t1	TGACG-motif	TGACG	1514	5	Hordeum vulgare	MeJA responsive
MS.gene035028.t1	TCA-element	CCATCTTTTT	257	9	Nicotiana tabacum	salicylic acid responsive
MS.gene035028.t1	TCA-element	TCAGAAGAGG	1629	9	Brassica oleracea	salicylic acid responsive
MS.gene035028.t1	ABRE	ACGTG	64	5	Arabidopsis thaliana	plant growth regulators
MS.gene035028.t1	ABRE	ACGTG	541	5	Arabidopsis thaliana	plant growth regulators
MS.gene035028.t1	ABRE	ACGTG	1525	5	Arabidopsis thaliana	plant growth regulators
MS.gene035028.t1	ABRE	ACGTG	1848	5	Arabidopsis thaliana	plant growth regulators
MS.gene035028.t1	G-box	CACGTC	64	6	Zea mays	light responsive
MS.gene035028.t1	Box 4	ATTAAT	1070	6	Petroselinum crispum	drought responsive
MS.gene035028.t1	Box 4	ATTAAT	1260	6	Petroselinum crispum	drought responsive
MS.gene035028.t1	ARE	AAACCA	370	6	Zea mays	anaerobic induction
MS.gene035028.t1	ARE	AAACCA	1339	6	Zea mays	anaerobic induction
MS.gene035028.t1	ARE	AAACCA	1947	6	Zea mays	anaerobic induction
MS.gene049798.t1	TGACG-motif	TGACG	1733	5	Hordeum vulgare	MeJA responsive
MS.gene049798.t1	CGTCA-motif	CGTCA	1733	5	Hordeum vulgare	MeJA responsive
MS.gene049798.t1	TCT-motif	TCTTAC	261	6	Arabidopsis thaliana	drought responsive
MS.gene049798.t1	TCT-motif	TCTTAC	1388	6	Arabidopsis thaliana	drought responsive
MS.gene049798.t1	GATA-motif	AAGATAAGATT	1191	10	Arabidopsis thaliana	drought responsive
MS.gene049798.t1	TGA-element	AACGAC	389	6	Brassica oleracea	plant growth regulators
MS.gene049798.t1	TGA-element	AACGAC	466	6	Brassica oleracea	plant growth regulators
MS.gene049798.t1	G-box	TACGTG	1587	6	Arabidopsis thaliana	light responsive
MS.gene049798.t1	G-box	CACGTC	1731	6	Zea mays	light responsive
MS.gene049798.t1	ARE	AAACCA	1727	6	Zea mays	anaerobic induction
MS.gene049798.t1	Box 4	ATTAAT	1181	6	Petroselinum crispum	drought responsive
MS.gene049798.t1	Box 4	ATTAAT	1548	6	Petroselinum crispum	drought responsive
MS.gene049798.t1	Box 4	ATTAAT	1604	6	Petroselinum crispum	drought responsive
MS.gene049798.t1	Box 4	ATTAAT	1760	6	Petroselinum crispum	drought responsive
MS.gene049798.t1	MBS	CAACTG	229	6	Arabidopsis thaliana	drought responsive
MS.gene049798.t1	ABRE	ACGTG	1587	5	Arabidopsis thaliana	plant growth regulators
MS.gene049798.t1	ABRE	ACGTG	1731	5	Arabidopsis thaliana	plant growth regulators
MS.gene049798.t1	I-box	cCATATCCAAT	1870	10	Flaveria trinervia	drought responsive
MS.gene049799.t1	I-box	cCATATCCAAT	1598	10	Flaveria trinervia	drought responsive
MS.gene049799.t1	TGA-element	AACGAC	120	6	Brassica oleracea	plant growth regulators
MS.gene049799.t1	TGA-element	AACGAC	196	6	Brassica oleracea	plant growth regulators
MS.gene049799.t1	TGA-element	AACGAC	1981	6	Brassica oleracea	plant growth regulators
MS.gene049799.t1	ARE	AAACCA	1455	6	Zea mays	anaerobic induction
MS.gene049799.t1	Box 4	ATTAAT	910	6	Petroselinum crispum	drought responsive
MS.gene049799.t1	Box 4	ATTAAT	1276	6	Petroselinum crispum	drought responsive
MS.gene049799.t1	Box 4	ATTAAT	1331	6	Petroselinum crispum	drought responsive
MS.gene049799.t1	Box 4	ATTAAT	1488	6	Petroselinum crispum	drought responsive
MS.gene049799.t1	G-box	TACGTG	1314	6	Arabidopsis thaliana	light responsive
MS.gene049799.t1	G-box	CACGTC	1459	6	Zea mays	light responsive
MS.gene049799.t1	ABRE	ACGTG	1314	5	Arabidopsis thaliana	plant growth regulators
MS.gene049799.t1	ABRE	ACGTG	1459	5	Arabidopsis thaliana	plant growth regulators
MS.gene049799.t1	GATA-motif	AAGATAAGATT	920	10	Arabidopsis thaliana	drought responsive
MS.gene049799.t1	TCT-motif	TCTTAC	1117	6	Arabidopsis thaliana	drought responsive
MS.gene049799.t1	CGTCA-motif	CGTCA	1461	5	Hordeum vulgare	MeJA responsive
MS.gene049799.t1	TGACG-motif	TGACG	1461	5	Hordeum vulgare	MeJA responsive
MS.gene051439.t1	P-box	CCTTTTG	763	7	Oryza sativa	plant growth regulators
MS.gene051439.t1	TGACG-motif	TGACG	760	5	Hordeum vulgare	MeJA responsive
MS.gene051439.t1	TGACG-motif	TGACG	1032	5	Hordeum vulgare	MeJA responsive
MS.gene051439.t1	G-Box	CACGTT	61	6	Pisum sativum	light responsive
MS.gene051439.t1	G-Box	CACGTT	1042	6	Pisum sativum	light responsive
MS.gene051439.t1	G-Box	CACGTT	1847	6	Pisum sativum	light responsive
MS.gene051439.t1	CGTCA-motif	CGTCA	760	5	Hordeum vulgare	MeJA responsive
MS.gene051439.t1	CGTCA-motif	CGTCA	1032	5	Hordeum vulgare	MeJA responsive
MS.gene051439.t1	TC-rich repeats	GTTTTCTTAC	1728	9	Nicotiana tabacum	involvement in defense and stress response
MS.gene051439.t1	LTR	CCGAAA	1662	6	Hordeum vulgare	low temperature responsive
MS.gene051439.t1	LTR	CCGAAA	1673	6	Hordeum vulgare	low temperature responsive
MS.gene051439.t1	GATA-motif	GATAGGA	1265	7	Arabidopsis thaliana	drought responsive
MS.gene051439.t1	TCT-motif	TCTTAC	1150	6	Arabidopsis thaliana	drought responsive
MS.gene051439.t1	ABRE	ACGTG	61	5	Arabidopsis thaliana	plant growth regulators
MS.gene051439.t1	ABRE	ACGTG	1043	5	Arabidopsis thaliana	plant growth regulators
MS.gene051439.t1	ABRE	ACGTG	1848	5	Arabidopsis thaliana	plant growth regulators
MS.gene051439.t1	TCA-element	TCAGAAGAGG	1151	9	Brassica oleracea	salicylic acid responsive
MS.gene051439.t1	TGA-element	AACGAC	1382	6	Brassica oleracea	plant growth regulators
MS.gene051439.t1	Box 4	ATTAAT	589	6	Petroselinum crispum	drought responsive
MS.gene051439.t1	Box 4	ATTAAT	779	6	Petroselinum crispum	drought responsive
MS.gene051439.t1	ARE	AAACCA	858	6	Zea mays	anaerobic induction
MS.gene051439.t1	ARE	AAACCA	1777	6	Zea mays	anaerobic induction
MS.gene051439.t1	ARE	AAACCA	1947	6	Zea mays	anaerobic induction
MS.gene051440.t1	ABRE	TACGGTC	1405	7	Arabidopsis thaliana	plant growth regulators
MS.gene051440.t1	ABRE	ACGTG	1443	5	Arabidopsis thaliana	plant growth regulators
MS.gene051440.t1	ARE	AAACCA	1636	6	Zea mays	anaerobic induction
MS.gene051440.t1	Box 4	ATTAAT	586	6	Petroselinum crispum	drought responsive
MS.gene051440.t1	Box 4	ATTAAT	837	6	Petroselinum crispum	drought responsive
MS.gene051440.t1	Box 4	ATTAAT	1009	6	Petroselinum crispum	drought responsive
MS.gene051440.t1	Box 4	ATTAAT	1054	6	Petroselinum crispum	drought responsive
MS.gene051440.t1	Box 4	ATTAAT	1134	6	Petroselinum crispum	drought responsive
MS.gene051440.t1	Box 4	ATTAAT	1542	6	Petroselinum crispum	drought responsive
MS.gene051440.t1	G-box	TAAACGTG	1443	8	Brassica oleracea	light responsive
MS.gene051440.t1	TGA-element	AACGAC	235	6	Brassica oleracea	plant growth regulators
MS.gene051440.t1	AE-box	AGAAACAA	1296	8	Arabidopsis thaliana	light responsive
MS.gene051440.t1	I-box	cGATAAGGCG	30	9	Zea mays	drought responsive
MS.gene051440.t1	I-box	AGATAAGG	32	8	Triticum aestivum	drought responsive
MS.gene051440.t1	GT1-motif	GCGGTAATT	1791	9	Oryza sativa	light responsive
MS.gene051440.t1	ATCT-motif	AATCTAATCC	118	9	Pisum sativum	drought responsive
MS.gene051440.t1	ATCT-motif	AATCTAATCC	146	9	Pisum sativum	drought responsive
MS.gene051440.t1	ATCT-motif	AATCTAATCC	189	9	Pisum sativum	drought responsive
MS.gene051440.t1	TGACG-motif	TGACG	690	5	Hordeum vulgare	MeJA responsive
MS.gene051440.t1	CGTCA-motif	CGTCA	690	5	Hordeum vulgare	MeJA responsive
MS.gene051440.t1	G-Box	TCCACATGGCA	1425	10	Triticum aestivum	light responsive
MS.gene051440.t1	G-Box	CACGTT	1443	6	Pisum sativum	light responsive
MS.gene051440.t1	TC-rich repeats	ATTCTCTAAC	433	9	Nicotiana tabacum	involvement in defense and stress response
MS.gene051440.t1	TC-rich repeats	GTTTTCTTAC	1913	9	Nicotiana tabacum	involvement in defense and stress response
MS.gene051440.t1	GATA-motif	AAGGATAAGG	1160	9	Solanum tuberosum	drought responsive
MS.gene09098.t1	Box 4	ATTAAT	1707	6	Petroselinum crispum	drought responsive
MS.gene09098.t1	ARE	AAACCA	285	6	Zea mays	anaerobic induction
MS.gene09098.t1	GARE-motif	TCTGTTG	227	7	Brassica oleracea	plant growth regulators
MS.gene09098.t1	G-box	TAACACGTAG	1651	9	Brassica oleracea	light responsive
MS.gene09098.t1	TGA-element	AACGAC	1204	6	Brassica oleracea	plant growth regulators
MS.gene09098.t1	TCA-element	CCATCTTTTT	1232	9	Nicotiana tabacum	salicylic acid responsive
MS.gene09098.t1	I-box	gGATAAGGTG	1931	9	Zea mays	drought responsive
MS.gene09098.t1	I-box	cCATATCCAAT	1933	10	Flaveria trinervia	drought responsive
MS.gene09098.t1	AE-box	AGAAACAA	123	8	Arabidopsis thaliana	light responsive
MS.gene09098.t1	LTR	CCGAAA	346	6	Hordeum vulgare	low temperature responsive
MS.gene09098.t1	LTR	CCGAAA	1161	6	Hordeum vulgare	low temperature responsive
MS.gene09098.t1	G-Box	TCCACATGGCA	742	10	Triticum aestivum	light responsive
MS.gene09098.t1	CGTCA-motif	CGTCA	1777	5	Hordeum vulgare	MeJA responsive
MS.gene09098.t1	TGACG-motif	TGACG	1777	5	Hordeum vulgare	MeJA responsive
MS.gene09098.t1	TC-rich repeats	GTTTTCTTAC	87	9	Nicotiana tabacum	involvement in defense and stress response
MS.gene09098.t1	TCT-motif	TCTTAC	91	6	Arabidopsis thaliana	drought responsive
MS.gene09104.t1	ABRE	ACGTG	764	5	Arabidopsis thaliana	plant growth regulators
MS.gene09104.t1	ABRE	ACGTG	900	5	Arabidopsis thaliana	plant growth regulators
MS.gene09104.t1	ABRE	ACGTG	1408	5	Arabidopsis thaliana	plant growth regulators
MS.gene09104.t1	ABRE	ACGTG	1575	5	Arabidopsis thaliana	plant growth regulators
MS.gene09104.t1	ABRE	ACGTG	1680	5	Arabidopsis thaliana	plant growth regulators
MS.gene09104.t1	Box 4	ATTAAT	590	6	Petroselinum crispum	drought responsive
MS.gene09104.t1	Box 4	ATTAAT	978	6	Petroselinum crispum	drought responsive
MS.gene09104.t1	Box 4	ATTAAT	1102	6	Petroselinum crispum	drought responsive
MS.gene09104.t1	ARE	AAACCA	69	6	Zea mays	anaerobic induction
MS.gene09104.t1	G-box	TAACACGTAG	762	9	Brassica oleracea	light responsive
MS.gene09104.t1	G-box	TACGTG	763	6	Arabidopsis thaliana	light responsive
MS.gene09104.t1	G-box	TACGTG	899	6	Arabidopsis thaliana	light responsive
MS.gene09104.t1	G-box	TACGTG	1408	6	Arabidopsis thaliana	light responsive
MS.gene09104.t1	G-box	CACGTC	1575	6	Zea mays	light responsive
MS.gene09104.t1	G-box	TAACACGTAG	1670	9	Brassica oleracea	light responsive
MS.gene09104.t1	TGA-element	AACGAC	1260	6	Brassica oleracea	plant growth regulators
MS.gene09104.t1	I-box	gGATAAGGTG	1874	9	Zea mays	drought responsive
MS.gene09104.t1	MRE	AACCTAA	185	7	Petroselinum crispum	drought responsive
MS.gene09104.t1	GT1-motif	GGTTAA	946	6	Arabidopsis thaliana	light responsive
MS.gene09104.t1	ATCT-motif	AATCTAATCC	82	9	Pisum sativum	drought responsive
MS.gene09104.t1	P-box	CCTTTTG	1017	7	Oryza sativa	plant growth regulators
MS.gene09104.t1	LTR	CCGAAA	1540	6	Hordeum vulgare	low temperature responsive
MS.gene09104.t1	G-Box	CACGTT	1680	6	Pisum sativum	light responsive
MS.gene09104.t1	CGTCA-motif	CGTCA	1577	5	Hordeum vulgare	MeJA responsive
MS.gene09104.t1	TGACG-motif	TGACG	1577	5	Hordeum vulgare	MeJA responsive
MS.gene09104.t1	GATA-motif	AAGATAAGATT	600	10	Arabidopsis thaliana	drought responsive
MS.gene09104.t1	TCT-motif	TCTTAC	1711	6	Arabidopsis thaliana	drought responsive
MS.gene09107.t1	TCT-motif	TCTTAC	762	6	Arabidopsis thaliana	drought responsive
MS.gene09107.t1	TGACG-motif	TGACG	156	5	Hordeum vulgare	MeJA responsive
MS.gene09107.t1	TGACG-motif	TGACG	950	5	Hordeum vulgare	MeJA responsive
MS.gene09107.t1	TGACG-motif	TGACG	1560	5	Hordeum vulgare	MeJA responsive
MS.gene09107.t1	TGACG-motif	TGACG	1777	5	Hordeum vulgare	MeJA responsive
MS.gene09107.t1	CGTCA-motif	CGTCA	156	5	Hordeum vulgare	MeJA responsive
MS.gene09107.t1	CGTCA-motif	CGTCA	950	5	Hordeum vulgare	MeJA responsive
MS.gene09107.t1	CGTCA-motif	CGTCA	1560	5	Hordeum vulgare	MeJA responsive
MS.gene09107.t1	CGTCA-motif	CGTCA	1777	5	Hordeum vulgare	MeJA responsive
MS.gene09107.t1	GT1-motif	GGTTAAT	141	7	Avena sativa	light responsive
MS.gene09107.t1	P-box	CCTTTTG	212	7	Oryza sativa	plant growth regulators
MS.gene09107.t1	AE-box	AGAAACAA	843	8	Arabidopsis thaliana	light responsive
MS.gene09107.t1	Box 4	ATTAAT	1166	6	Petroselinum crispum	drought responsive
MS.gene09107.t1	Box 4	ATTAAT	1406	6	Petroselinum crispum	drought responsive
MS.gene09107.t1	Box 4	ATTAAT	1713	6	Petroselinum crispum	drought responsive
MS.gene09107.t1	G-box	CACGTC	154	6	Zea mays	light responsive
MS.gene09107.t1	G-box	CACGTC	951	6	Zea mays	light responsive
MS.gene09107.t1	G-box	CACGTC	1558	6	Zea mays	light responsive
MS.gene09107.t1	G-box	TAACACGTAG	1657	9	Brassica oleracea	light responsive
MS.gene09107.t1	ABRE	ACGTG	154	5	Arabidopsis thaliana	plant growth regulators
MS.gene09107.t1	ABRE	ACGTG	952	5	Arabidopsis thaliana	plant growth regulators
MS.gene09107.t1	ABRE	ACGTG	1558	5	Arabidopsis thaliana	plant growth regulators
MS.gene09107.t1	MBS	CAACTG	459	6	Arabidopsis thaliana	drought responsive
MS.gene09107.t1	TCA-element	CCATCTTTTT	262	9	Nicotiana tabacum	salicylic acid responsive
MS.gene09107.t1	TCA-element	TCAGAAGAGG	927	9	Brassica oleracea	salicylic acid responsive
MS.gene09153.t1	ABRE	TACGTGTC	1219	8	Oryza sativa	plant growth regulators
MS.gene09153.t1	ABRE	ACGTG	1221	5	Arabidopsis thaliana	plant growth regulators
MS.gene09153.t1	ABRE	ACGTG	1531	5	Arabidopsis thaliana	plant growth regulators
MS.gene09153.t1	TCA-element	CCATCTTTTT	138	9	Nicotiana tabacum	salicylic acid responsive
MS.gene09153.t1	Box 4	ATTAAT	1299	6	Petroselinum crispum	drought responsive
MS.gene09153.t1	Box 4	ATTAAT	1712	6	Petroselinum crispum	drought responsive
MS.gene09153.t1	ARE	AAACCA	419	6	Zea mays	anaerobic induction
MS.gene09153.t1	ARE	AAACCA	919	6	Zea mays	anaerobic induction
MS.gene09153.t1	ARE	AAACCA	1905	6	Zea mays	anaerobic induction
MS.gene09153.t1	G-box	TAACACGTAG	1076	9	Brassica oleracea	light responsive
MS.gene09153.t1	G-box	TACGTG	1221	6	Arabidopsis thaliana	light responsive
MS.gene09153.t1	G-box	TACGTG	1531	6	Arabidopsis thaliana	light responsive
MS.gene09153.t1	I-box	gGATAAGGTG	1929	9	Zea mays	drought responsive
MS.gene09153.t1	I-box	cCATATCCAAT	1931	10	Flaveria trinervia	drought responsive
MS.gene09153.t1	MRE	AACCTAA	535	7	Petroselinum crispum	drought responsive
MS.gene09153.t1	CGTCA-motif	CGTCA	150	5	Hordeum vulgare	MeJA responsive
MS.gene09153.t1	TGACG-motif	TGACG	150	5	Hordeum vulgare	MeJA responsive
MS.gene09153.t1	TC-rich repeats	GTTTTCTTAC	1465	9	Nicotiana tabacum	involvement in defense and stress response
MS.gene09153.t1	GATA-motif	GATAGGA	342	7	Arabidopsis thaliana	drought responsive
MS.gene09153.t1	TCT-motif	TCTTAC	840	6	Arabidopsis thaliana	drought responsive
MS.gene21415.t1	MBS	CAACTG	1836	6	Arabidopsis thaliana	drought responsive
MS.gene21415.t1	MBS	CAACTG	1861	6	Arabidopsis thaliana	drought responsive
MS.gene21415.t1	ABRE	CGTACGTGCA	1490	9	Hordeum vulgare	plant growth regulators
MS.gene21415.t1	TGA-element	AACGAC	107	6	Brassica oleracea	plant growth regulators
MS.gene21415.t1	G-box	CACGAC	1312	6	Zea mays	light responsive
MS.gene21415.t1	GARE-motif	TCTGTTG	1533	7	Brassica oleracea	plant growth regulators
MS.gene21415.t1	Box 4	ATTAAT	1162	6	Petroselinum crispum	drought responsive
MS.gene21415.t1	ARE	AAACCA	156	6	Zea mays	anaerobic induction
MS.gene21415.t1	AE-box	AGAAACTT	1525	8	Arabidopsis thaliana	light responsive
MS.gene21415.t1	ATCT-motif	AATCTAATCC	733	9	Pisum sativum	drought responsive
MS.gene21415.t1	ATCT-motif	AATCTAATCC	768	9	Pisum sativum	drought responsive
MS.gene21415.t1	GT1-motif	GGTTAAT	198	7	Avena sativa	light responsive
MS.gene21415.t1	GT1-motif	GGTTAA	199	6	Arabidopsis thaliana	light responsive
MS.gene21415.t1	GT1-motif	GGTTAA	1853	6	Arabidopsis thaliana	light responsive
MS.gene21415.t1	LTR	CCGAAA	300	6	Hordeum vulgare	low temperature responsive
MS.gene21415.t1	TCT-motif	TCTTAC	838	6	Arabidopsis thaliana	drought responsive
MS.gene21415.t1	TCT-motif	TCTTAC	1842	6	Arabidopsis thaliana	drought responsive
MS.gene21415.t1	GATA-motif	AAGATAAGATT	78	10	Arabidopsis thaliana	drought responsive
MS.gene24088.t1	I-box	cCATATCCAAT	1678	10	Flaveria trinervia	drought responsive
MS.gene24088.t1	MRE	AACCTAA	126	7	Petroselinum crispum	drought responsive
MS.gene24088.t1	Box 4	ATTAAT	232	6	Petroselinum crispum	drought responsive
MS.gene24088.t1	Box 4	ATTAAT	1007	6	Petroselinum crispum	drought responsive
MS.gene24088.t1	G-box	TAAACGTG	1757	8	Brassica oleracea	light responsive
MS.gene24088.t1	ABRE	ACGTG	1757	5	Arabidopsis thaliana	plant growth regulators
MS.gene24088.t1	MBS	CAACTG	375	6	Arabidopsis thaliana	drought responsive
MS.gene24088.t1	TCT-motif	TCTTAC	1188	6	Arabidopsis thaliana	drought responsive
MS.gene24088.t1	CGTCA-motif	CGTCA	589	5	Hordeum vulgare	MeJA responsive
MS.gene24088.t1	G-Box	CACGTT	1757	6	Pisum sativum	light responsive
MS.gene24088.t1	TGACG-motif	TGACG	589	5	Hordeum vulgare	MeJA responsive
MS.gene24088.t1	LTR	CCGAAA	1647	6	Hordeum vulgare	low temperature responsive
MS.gene24088.t1	ATCT-motif	AATCTAATCC	1204	9	Pisum sativum	drought responsive
MS.gene24088.t1	GT1-motif	GGTTAA	1507	6	Arabidopsis thaliana	light responsive
MS.gene27109.t1	G-Box	CACGTT	1763	6	Pisum sativum	light responsive
MS.gene27109.t1	CGTCA-motif	CGTCA	574	5	Hordeum vulgare	MeJA responsive
MS.gene27109.t1	TGACG-motif	TGACG	574	5	Hordeum vulgare	MeJA responsive
MS.gene27109.t1	LTR	CCGAAA	1653	6	Hordeum vulgare	low temperature responsive
MS.gene27109.t1	ATCT-motif	AATCTAATCC	1206	9	Pisum sativum	drought responsive
MS.gene27109.t1	GT1-motif	GGTTAA	1513	6	Arabidopsis thaliana	light responsive
MS.gene27109.t1	TCT-motif	TCTTAC	1190	6	Arabidopsis thaliana	drought responsive
MS.gene27109.t1	G-box	TAAACGTG	1763	8	Brassica oleracea	light responsive
MS.gene27109.t1	Box 4	ATTAAT	217	6	Petroselinum crispum	drought responsive
MS.gene27109.t1	Box 4	ATTAAT	992	6	Petroselinum crispum	drought responsive
MS.gene27109.t1	MBS	CAACTG	360	6	Arabidopsis thaliana	drought responsive
MS.gene27109.t1	ABRE	ACGTG	1763	5	Arabidopsis thaliana	plant growth regulators
MS.gene27109.t1	MRE	AACCTAA	111	7	Petroselinum crispum	drought responsive
MS.gene27109.t1	I-box	cCATATCCAAT	1684	10	Flaveria trinervia	drought responsive
MS.gene29781.t1	P-box	CCTTTTG	1002	7	Oryza sativa	plant growth regulators
MS.gene29781.t1	CGTCA-motif	CGTCA	682	5	Hordeum vulgare	MeJA responsive
MS.gene29781.t1	TGACG-motif	TGACG	682	5	Hordeum vulgare	MeJA responsive
MS.gene29781.t1	GATA-motif	GATAGGG	1048	7	Pisum sativum	drought responsive
MS.gene29781.t1	MBS	CAACTG	230	6	Arabidopsis thaliana	drought responsive
MS.gene29781.t1	MBS	CAACTG	926	6	Arabidopsis thaliana	drought responsive
MS.gene29781.t1	ABRE	ACGTG	717	5	Arabidopsis thaliana	plant growth regulators
MS.gene29781.t1	ABRE	ACGTG	1733	5	Arabidopsis thaliana	plant growth regulators
MS.gene29781.t1	G-box	TACGTG	716	6	Arabidopsis thaliana	light responsive
MS.gene29781.t1	G-box	TACGTG	1732	6	Arabidopsis thaliana	light responsive
MS.gene29781.t1	ARE	AAACCA	1413	6	Zea mays	anaerobic induction
MS.gene29781.t1	Box 4	ATTAAT	1244	6	Petroselinum crispum	drought responsive
MS.gene29781.t1	Box 4	ATTAAT	1279	6	Petroselinum crispum	drought responsive
MS.gene29781.t1	Box 4	ATTAAT	1492	6	Petroselinum crispum	drought responsive
MS.gene29781.t1	Box 4	ATTAAT	1535	6	Petroselinum crispum	drought responsive
MS.gene29781.t1	AE-box	AGAAACAA	915	8	Arabidopsis thaliana	light responsive
MS.gene29781.t1	AE-box	AGAAACAA	1175	8	Arabidopsis thaliana	light responsive
MS.gene31229.t1	TCT-motif	TCTTAC	1640	6	Arabidopsis thaliana	drought responsive
MS.gene31229.t1	Box 4	ATTAAT	170	6	Petroselinum crispum	drought responsive
MS.gene31229.t1	Box 4	ATTAAT	487	6	Petroselinum crispum	drought responsive
MS.gene31229.t1	Box 4	ATTAAT	1646	6	Petroselinum crispum	drought responsive
MS.gene31229.t1	Box 4	ATTAAT	1879	6	Petroselinum crispum	drought responsive
MS.gene31229.t1	ARE	AAACCA	346	6	Zea mays	anaerobic induction
MS.gene31229.t1	ARE	AAACCA	369	6	Zea mays	anaerobic induction
MS.gene31229.t1	ARE	AAACCA	399	6	Zea mays	anaerobic induction
MS.gene31229.t1	ARE	AAACCA	663	6	Zea mays	anaerobic induction
MS.gene31229.t1	ARE	AAACCA	689	6	Zea mays	anaerobic induction
MS.gene31229.t1	ARE	AAACCA	719	6	Zea mays	anaerobic induction
MS.gene31229.t1	ARE	AAACCA	1964	6	Zea mays	anaerobic induction
MS.gene31229.t1	ARE	AAACCA	1983	6	Zea mays	anaerobic induction
MS.gene31229.t1	GARE-motif	TCTGTTG	96	7	Brassica oleracea	plant growth regulators
MS.gene31230.t1	P-box	CCTTTTG	780	7	Oryza sativa	plant growth regulators
MS.gene31230.t1	LTR	CCGAAA	633	6	Hordeum vulgare	low temperature responsive
MS.gene31230.t1	LTR	CCGAAA	1270	6	Hordeum vulgare	low temperature responsive
MS.gene31230.t1	CGTCA-motif	CGTCA	913	5	Hordeum vulgare	MeJA responsive
MS.gene31230.t1	TGACG-motif	TGACG	913	5	Hordeum vulgare	MeJA responsive
MS.gene31230.t1	MRE	AACCTAA	1293	7	Petroselinum crispum	drought responsive
MS.gene31230.t1	MBS	CAACTG	885	6	Arabidopsis thaliana	drought responsive
MS.gene31230.t1	MBS	CAACTG	1026	6	Arabidopsis thaliana	drought responsive
MS.gene31230.t1	ABRE	CGCACGTGTC	657	9	Hordeum vulgare	plant growth regulators
MS.gene31230.t1	GARE-motif	TCTGTTG	891	7	Brassica oleracea	plant growth regulators
MS.gene31230.t1	Box 4	ATTAAT	21	6	Petroselinum crispum	drought responsive
MS.gene31230.t1	Box 4	ATTAAT	85	6	Petroselinum crispum	drought responsive
MS.gene31230.t1	Box 4	ATTAAT	372	6	Petroselinum crispum	drought responsive
MS.gene31230.t1	Box 4	ATTAAT	566	6	Petroselinum crispum	drought responsive
MS.gene31230.t1	ARE	AAACCA	976	6	Zea mays	anaerobic induction
MS.gene31230.t1	ARE	AAACCA	1267	6	Zea mays	anaerobic induction
MS.gene31230.t1	ARE	AAACCA	1965	6	Zea mays	anaerobic induction
MS.gene31230.t1	ARE	AAACCA	1984	6	Zea mays	anaerobic induction
MS.gene31230.t1	TGA-element	AACGAC	1014	6	Brassica oleracea	plant growth regulators
MS.gene31230.t1	TGA-element	AACGAC	1436	6	Brassica oleracea	plant growth regulators
MS.gene32098.t1	GATA-motif	GATAGGA	439	7	Arabidopsis thaliana	drought responsive
MS.gene32098.t1	GATA-motif	AAGGATAAGG	740	9	Solanum tuberosum	drought responsive
MS.gene32098.t1	GATA-motif	AAGATAAGATT	1510	10	Arabidopsis thaliana	drought responsive
MS.gene32098.t1	GT1-motif	GGTTAA	1449	6	Arabidopsis thaliana	light responsive
MS.gene32098.t1	P-box	CCTTTTG	1076	7	Oryza sativa	plant growth regulators
MS.gene32098.t1	LTR	CCGAAA	1135	6	Hordeum vulgare	low temperature responsive
MS.gene32098.t1	LTR	CCGAAA	1935	6	Hordeum vulgare	low temperature responsive
MS.gene32098.t1	CGTCA-motif	CGTCA	516	5	Hordeum vulgare	MeJA responsive
MS.gene32098.t1	TGACG-motif	TGACG	516	5	Hordeum vulgare	MeJA responsive
MS.gene32098.t1	MRE	AACCTAA	83	7	Petroselinum crispum	drought responsive
MS.gene32098.t1	MRE	AACCTAA	676	7	Petroselinum crispum	drought responsive
MS.gene32098.t1	MRE	AACCTAA	681	7	Petroselinum crispum	drought responsive
MS.gene32098.t1	I-box	atGATAAGGTC	738	10	Helianthus annuus	drought responsive
MS.gene32098.t1	I-box	AGATAAGG	740	8	Triticum aestivum	drought responsive
MS.gene32098.t1	AE-box	AGAAACAA	994	8	Arabidopsis thaliana	light responsive
MS.gene32098.t1	TCA-element	CCATCTTTTT	559	9	Nicotiana tabacum	salicylic acid responsive
MS.gene32098.t1	ARE	AAACCA	359	6	Zea mays	anaerobic induction
MS.gene32098.t1	Box 4	ATTAAT	1672	6	Petroselinum crispum	drought responsive
MS.gene35476.t1	ARE	AAACCA	1406	6	Zea mays	anaerobic induction
MS.gene35476.t1	Box 4	ATTAAT	1115	6	Petroselinum crispum	drought responsive
MS.gene35476.t1	Box 4	ATTAAT	1150	6	Petroselinum crispum	drought responsive
MS.gene35476.t1	Box 4	ATTAAT	1274	6	Petroselinum crispum	drought responsive
MS.gene35476.t1	Box 4	ATTAAT	1485	6	Petroselinum crispum	drought responsive
MS.gene35476.t1	Box 4	ATTAAT	1527	6	Petroselinum crispum	drought responsive
MS.gene35476.t1	G-box	TACGTG	585	6	Arabidopsis thaliana	light responsive
MS.gene35476.t1	G-box	TACGTG	1726	6	Arabidopsis thaliana	light responsive
MS.gene35476.t1	ABRE	ACGTG	586	5	Arabidopsis thaliana	plant growth regulators
MS.gene35476.t1	ABRE	ACGTG	1727	5	Arabidopsis thaliana	plant growth regulators
MS.gene35476.t1	MBS	CAACTG	86	6	Arabidopsis thaliana	drought responsive
MS.gene35476.t1	MBS	CAACTG	797	6	Arabidopsis thaliana	drought responsive
MS.gene35476.t1	AE-box	AGAAACAA	786	8	Arabidopsis thaliana	light responsive
MS.gene35476.t1	AE-box	AGAAACAA	1046	8	Arabidopsis thaliana	light responsive
MS.gene35476.t1	CGTCA-motif	CGTCA	551	5	Hordeum vulgare	MeJA responsive
MS.gene35476.t1	TGACG-motif	TGACG	551	5	Hordeum vulgare	MeJA responsive
MS.gene35476.t1	P-box	CCTTTTG	873	7	Oryza sativa	plant growth regulators
MS.gene35476.t1	GATA-motif	GATAGGG	919	7	Pisum sativum	drought responsive
MS.gene35477.t1	CGTCA-motif	CGTCA	657	5	Hordeum vulgare	MeJA responsive
MS.gene35477.t1	TGACG-motif	TGACG	657	5	Hordeum vulgare	MeJA responsive
MS.gene35477.t1	LTR	CCGAAA	396	6	Hordeum vulgare	low temperature responsive
MS.gene35477.t1	GT1-motif	GGTTAA	233	6	Arabidopsis thaliana	light responsive
MS.gene35477.t1	GATA-motif	GATAGGG	1152	7	Pisum sativum	drought responsive
MS.gene35477.t1	TGA-element	AACGAC	929	6	Brassica oleracea	plant growth regulators
MS.gene35477.t1	Box 4	ATTAAT	1594	6	Petroselinum crispum	drought responsive
MS.gene35477.t1	ARE	AAACCA	99	6	Zea mays	anaerobic induction
MS.gene35477.t1	ARE	AAACCA	287	6	Zea mays	anaerobic induction
MS.gene35477.t1	ARE	AAACCA	974	6	Zea mays	anaerobic induction
MS.gene35477.t1	ARE	AAACCA	1138	6	Zea mays	anaerobic induction
MS.gene35477.t1	ARE	AAACCA	1634	6	Zea mays	anaerobic induction
MS.gene35477.t1	GARE-motif	TCTGTTG	254	7	Brassica oleracea	plant growth regulators
MS.gene35477.t1	G-box	CACGAC	661	6	Zea mays	light responsive
MS.gene35477.t1	MBS	CAACTG	1755	6	Arabidopsis thaliana	drought responsive
MS.gene35477.t1	AE-box	AGAAACTT	613	8	Arabidopsis thaliana	light responsive
MS.gene35477.t1	MRE	AACCTAA	852	7	Petroselinum crispum	drought responsive
MS.gene40027.t1	ABRE	TACGTGTC	1385	8	Oryza sativa	plant growth regulators
MS.gene40027.t1	ABRE	ACGTG	1386	5	Arabidopsis thaliana	plant growth regulators
MS.gene40027.t1	G-box	CACGAC	730	6	Zea mays	light responsive
MS.gene40027.t1	G-box	TACGTG	1385	6	Arabidopsis thaliana	light responsive
MS.gene40027.t1	ARE	AAACCA	932	6	Zea mays	anaerobic induction
MS.gene40027.t1	Box 4	ATTAAT	591	6	Petroselinum crispum	drought responsive
MS.gene40027.t1	Box 4	ATTAAT	739	6	Petroselinum crispum	drought responsive
MS.gene40027.t1	TGA-element	AACGAC	140	6	Brassica oleracea	plant growth regulators
MS.gene40027.t1	TCT-motif	TCTTAC	1204	6	Arabidopsis thaliana	drought responsive
MS.gene40027.t1	GT1-motif	GGTTAA	504	6	Arabidopsis thaliana	light responsive
MS.gene40027.t1	GT1-motif	GGTTAA	641	6	Arabidopsis thaliana	light responsive
MS.gene40027.t1	GT1-motif	GGTTAA	1292	6	Arabidopsis thaliana	light responsive
MS.gene40027.t1	P-box	CCTTTTG	342	7	Oryza sativa	plant growth regulators
MS.gene40027.t1	LTR	CCGAAA	1885	6	Hordeum vulgare	low temperature responsive
MS.gene40027.t1	TC-rich repeats	ATTCTCTAAC	1269	9	Nicotiana tabacum	involvement in defense and stress response
MS.gene43857.t1	I-box	cCATATCCAAT	1778	10	Flaveria trinervia	drought responsive
MS.gene43857.t1	Box 4	ATTAAT	62	6	Petroselinum crispum	drought responsive
MS.gene43857.t1	Box 4	ATTAAT	1119	6	Petroselinum crispum	drought responsive
MS.gene43857.t1	Box 4	ATTAAT	1567	6	Petroselinum crispum	drought responsive
MS.gene43857.t1	ARE	AAACCA	1288	6	Zea mays	anaerobic induction
MS.gene43857.t1	ARE	AAACCA	1379	6	Zea mays	anaerobic induction
MS.gene43857.t1	ARE	AAACCA	1964	6	Zea mays	anaerobic induction
MS.gene43857.t1	ARE	AAACCA	1983	6	Zea mays	anaerobic induction
MS.gene43857.t1	TGA-element	AACGAC	448	6	Brassica oleracea	plant growth regulators
MS.gene43857.t1	TGA-element	AACGAC	637	6	Brassica oleracea	plant growth regulators
MS.gene43857.t1	TCT-motif	TCTTAC	1518	6	Arabidopsis thaliana	drought responsive
MS.gene43857.t1	GT1-motif	GGTTAA	883	6	Arabidopsis thaliana	light responsive
MS.gene43858.t1	MRE	AACCTAA	1295	7	Petroselinum crispum	drought responsive
MS.gene43858.t1	MBS	CAACTG	887	6	Arabidopsis thaliana	drought responsive
MS.gene43858.t1	MBS	CAACTG	1028	6	Arabidopsis thaliana	drought responsive
MS.gene43858.t1	ABRE	CGCACGTGTC	659	9	Hordeum vulgare	plant growth regulators
MS.gene43858.t1	ABRE	ACGTG	815	5	Arabidopsis thaliana	plant growth regulators
MS.gene43858.t1	G-box	CCACGTAA	813	8	Brassica napus	light responsive
MS.gene43858.t1	G-box	TACGTG	814	6	Arabidopsis thaliana	light responsive
MS.gene43858.t1	GARE-motif	TCTGTTG	893	7	Brassica oleracea	plant growth regulators
MS.gene43858.t1	ARE	AAACCA	978	6	Zea mays	anaerobic induction
MS.gene43858.t1	ARE	AAACCA	1269	6	Zea mays	anaerobic induction
MS.gene43858.t1	ARE	AAACCA	1965	6	Zea mays	anaerobic induction
MS.gene43858.t1	ARE	AAACCA	1984	6	Zea mays	anaerobic induction
MS.gene43858.t1	Box 4	ATTAAT	24	6	Petroselinum crispum	drought responsive
MS.gene43858.t1	Box 4	ATTAAT	87	6	Petroselinum crispum	drought responsive
MS.gene43858.t1	Box 4	ATTAAT	374	6	Petroselinum crispum	drought responsive
MS.gene43858.t1	Box 4	ATTAAT	568	6	Petroselinum crispum	drought responsive
MS.gene43858.t1	TGA-element	AACGAC	1016	6	Brassica oleracea	plant growth regulators
MS.gene43858.t1	TGA-element	AACGAC	1437	6	Brassica oleracea	plant growth regulators
MS.gene43858.t1	P-box	CCTTTTG	782	7	Oryza sativa	plant growth regulators
MS.gene43858.t1	LTR	CCGAAA	635	6	Hordeum vulgare	low temperature responsive
MS.gene43858.t1	LTR	CCGAAA	1272	6	Hordeum vulgare	low temperature responsive
MS.gene43858.t1	TGACG-motif	TGACG	915	5	Hordeum vulgare	MeJA responsive
MS.gene43858.t1	CGTCA-motif	CGTCA	915	5	Hordeum vulgare	MeJA responsive
MS.gene61077.t1	GATA-motif	AAGGATAAGG	616	9	Solanum tuberosum	drought responsive
MS.gene61077.t1	LTR	CCGAAA	1246	6	Hordeum vulgare	low temperature responsive
MS.gene61077.t1	LTR	CCGAAA	1597	6	Hordeum vulgare	low temperature responsive
MS.gene61077.t1	TC-rich repeats	ATTCTCTAAC	459	9	Nicotiana tabacum	involvement in defense and stress response
MS.gene61077.t1	G-Box	CACGTT	629	6	Pisum sativum	light responsive
MS.gene61077.t1	G-Box	CACGTG	1161	6	Pisum sativum	light responsive
MS.gene61077.t1	GT1-motif	GGTTAA	32	6	Arabidopsis thaliana	light responsive
MS.gene61077.t1	GT1-motif	GGTTAA	1635	6	Arabidopsis thaliana	light responsive
MS.gene61077.t1	G-box	ACACGTGT	1160	8	Brassica napus	light responsive
MS.gene61077.t1	G-box	CACGTG	1161	6	Arabidopsis thaliana	light responsive
MS.gene61077.t1	ARE	AAACCA	832	6	Zea mays	anaerobic induction
MS.gene61077.t1	ARE	AAACCA	1708	6	Zea mays	anaerobic induction
MS.gene61077.t1	ARE	AAACCA	1733	6	Zea mays	anaerobic induction
MS.gene61077.t1	Box 4	ATTAAT	402	6	Petroselinum crispum	drought responsive
MS.gene61077.t1	Box 4	ATTAAT	1806	6	Petroselinum crispum	drought responsive
MS.gene61077.t1	ABRE	ACGTG	630	5	Arabidopsis thaliana	plant growth regulators
MS.gene61077.t1	ABRE	CACGTG	1161	6	Arabidopsis thaliana	plant growth regulators
MS.gene61077.t1	ABRE	ACGTG	1162	5	Arabidopsis thaliana	plant growth regulators
MS.gene61755.t1	TCT-motif	TCTTAC	885	6	Arabidopsis thaliana	drought responsive
MS.gene61755.t1	TCT-motif	TCTTAC	994	6	Arabidopsis thaliana	drought responsive
MS.gene61755.t1	TCT-motif	TCTTAC	1142	6	Arabidopsis thaliana	drought responsive
MS.gene61755.t1	LTR	CCGAAA	1615	6	Hordeum vulgare	low temperature responsive
MS.gene61755.t1	TC-rich repeats	ATTCTCTAAC	1105	9	Nicotiana tabacum	involvement in defense and stress response
MS.gene61755.t1	CGTCA-motif	CGTCA	849	5	Hordeum vulgare	MeJA responsive
MS.gene61755.t1	TGACG-motif	TGACG	849	5	Hordeum vulgare	MeJA responsive
MS.gene61755.t1	GT1-motif	GGTTAAT	380	7	Avena sativa	light responsive
MS.gene61755.t1	GT1-motif	GGTTAA	1653	6	Arabidopsis thaliana	light responsive
MS.gene61755.t1	G-box	CACGTC	1066	6	Zea mays	light responsive
MS.gene61755.t1	ARE	AAACCA	726	6	Zea mays	anaerobic induction
MS.gene61755.t1	ARE	AAACCA	1059	6	Zea mays	anaerobic induction
MS.gene61755.t1	ARE	AAACCA	1729	6	Zea mays	anaerobic induction
MS.gene61755.t1	Box 4	ATTAAT	589	6	Petroselinum crispum	drought responsive
MS.gene61755.t1	Box 4	ATTAAT	1518	6	Petroselinum crispum	drought responsive
MS.gene61755.t1	Box 4	ATTAAT	1827	6	Petroselinum crispum	drought responsive
MS.gene61755.t1	ABRE	ACGTG	1067	5	Arabidopsis thaliana	plant growth regulators
MS.gene68419.t1	CGTCA-motif	CGTCA	1299	5	Hordeum vulgare	MeJA responsive
MS.gene68419.t1	CGTCA-motif	CGTCA	1757	5	Hordeum vulgare	MeJA responsive
MS.gene68419.t1	TGACG-motif	TGACG	1299	5	Hordeum vulgare	MeJA responsive
MS.gene68419.t1	TGACG-motif	TGACG	1757	5	Hordeum vulgare	MeJA responsive
MS.gene68419.t1	GT1-motif	GGTTAA	1843	6	Arabidopsis thaliana	light responsive
MS.gene68419.t1	ATCT-motif	AATCTAATCC	468	9	Pisum sativum	drought responsive
MS.gene68419.t1	TCT-motif	TCTTAC	538	6	Arabidopsis thaliana	drought responsive
MS.gene68419.t1	TCT-motif	TCTTAC	1832	6	Arabidopsis thaliana	drought responsive
MS.gene68419.t1	Box 4	ATTAAT	1153	6	Petroselinum crispum	drought responsive
MS.gene68419.t1	GARE-motif	TCTGTTG	1521	7	Brassica oleracea	plant growth regulators
MS.gene68419.t1	ABRE	CGTACGTGCA	1478	9	Hordeum vulgare	plant growth regulators
MS.gene68419.t1	MBS	CAACTG	1861	6	Arabidopsis thaliana	drought responsive
MS.gene68419.t1	AE-box	AGAAACTT	1513	8	Arabidopsis thaliana	light responsive
MS.gene68421.t1	GT1-motif	GGTTAA	1843	6	Arabidopsis thaliana	light responsive
MS.gene68421.t1	ATCT-motif	AATCTAATCC	468	9	Pisum sativum	drought responsive
MS.gene68421.t1	CGTCA-motif	CGTCA	1299	5	Hordeum vulgare	MeJA responsive
MS.gene68421.t1	CGTCA-motif	CGTCA	1757	5	Hordeum vulgare	MeJA responsive
MS.gene68421.t1	TGACG-motif	TGACG	1299	5	Hordeum vulgare	MeJA responsive
MS.gene68421.t1	TGACG-motif	TGACG	1757	5	Hordeum vulgare	MeJA responsive
MS.gene68421.t1	TCT-motif	TCTTAC	538	6	Arabidopsis thaliana	drought responsive
MS.gene68421.t1	TCT-motif	TCTTAC	1832	6	Arabidopsis thaliana	drought responsive
MS.gene68421.t1	MBS	CAACTG	1861	6	Arabidopsis thaliana	drought responsive
MS.gene68421.t1	ABRE	CGTACGTGCA	1478	9	Hordeum vulgare	plant growth regulators
MS.gene68421.t1	GARE-motif	TCTGTTG	1521	7	Brassica oleracea	plant growth regulators
MS.gene68421.t1	Box 4	ATTAAT	1153	6	Petroselinum crispum	drought responsive
MS.gene68421.t1	AE-box	AGAAACTT	1513	8	Arabidopsis thaliana	light responsive
MS.gene88460.t1	G-box	CACGTC	1088	6	Zea mays	light responsive
MS.gene88460.t1	Box 4	ATTAAT	617	6	Petroselinum crispum	drought responsive
MS.gene88460.t1	Box 4	ATTAAT	1827	6	Petroselinum crispum	drought responsive
MS.gene88460.t1	ARE	AAACCA	446	6	Zea mays	anaerobic induction
MS.gene88460.t1	ARE	AAACCA	754	6	Zea mays	anaerobic induction
MS.gene88460.t1	ARE	AAACCA	1081	6	Zea mays	anaerobic induction
MS.gene88460.t1	ARE	AAACCA	1493	6	Zea mays	anaerobic induction
MS.gene88460.t1	ARE	AAACCA	1728	6	Zea mays	anaerobic induction
MS.gene88460.t1	ABRE	ACGTG	1089	5	Arabidopsis thaliana	plant growth regulators
MS.gene88460.t1	MRE	AACCTAA	1488	7	Petroselinum crispum	drought responsive
MS.gene88460.t1	AE-box	AGAAACAA	1534	8	Arabidopsis thaliana	light responsive
MS.gene88460.t1	LTR	CCGAAA	1615	6	Hordeum vulgare	low temperature responsive
MS.gene88460.t1	TC-rich repeats	ATTCTCTAAC	1127	9	Nicotiana tabacum	involvement in defense and stress response
MS.gene88460.t1	CGTCA-motif	CGTCA	873	5	Hordeum vulgare	MeJA responsive
MS.gene88460.t1	TGACG-motif	TGACG	873	5	Hordeum vulgare	MeJA responsive
MS.gene88460.t1	GT1-motif	GGTTAAT	408	7	Avena sativa	light responsive
MS.gene88460.t1	GT1-motif	GGTTAA	1653	6	Arabidopsis thaliana	light responsive
MS.gene88460.t1	TCT-motif	TCTTAC	909	6	Arabidopsis thaliana	drought responsive
MS.gene88460.t1	TCT-motif	TCTTAC	1018	6	Arabidopsis thaliana	drought responsive
MS.gene88460.t1	TCT-motif	TCTTAC	1170	6	Arabidopsis thaliana	drought responsive
MS.gene88935.t1	I-box	cCATATCCAAT	1681	10	Flaveria trinervia	drought responsive
MS.gene88935.t1	MRE	AACCTAA	124	7	Petroselinum crispum	drought responsive
MS.gene88935.t1	ABRE	ACGTG	1760	5	Arabidopsis thaliana	plant growth regulators
MS.gene88935.t1	MBS	CAACTG	373	6	Arabidopsis thaliana	drought responsive
MS.gene88935.t1	Box 4	ATTAAT	230	6	Petroselinum crispum	drought responsive
MS.gene88935.t1	Box 4	ATTAAT	1001	6	Petroselinum crispum	drought responsive
MS.gene88935.t1	G-box	TAAACGTG	1760	8	Brassica oleracea	light responsive
MS.gene88935.t1	TCT-motif	TCTTAC	1191	6	Arabidopsis thaliana	drought responsive
MS.gene88935.t1	GT1-motif	GGTTAA	1510	6	Arabidopsis thaliana	light responsive
MS.gene88935.t1	ATCT-motif	AATCTAATCC	1207	9	Pisum sativum	drought responsive
MS.gene88935.t1	LTR	CCGAAA	1650	6	Hordeum vulgare	low temperature responsive
MS.gene88935.t1	CGTCA-motif	CGTCA	587	5	Hordeum vulgare	MeJA responsive
MS.gene88935.t1	G-Box	CACGTT	1760	6	Pisum sativum	light responsive
MS.gene88935.t1	TGACG-motif	TGACG	587	5	Hordeum vulgare	MeJA responsive
MS.gene88987.t1	TCT-motif	TCTTAC	1194	6	Arabidopsis thaliana	drought responsive
MS.gene88987.t1	ATCT-motif	AATCTAATCC	1210	9	Pisum sativum	drought responsive
MS.gene88987.t1	GT1-motif	GGTTAA	1513	6	Arabidopsis thaliana	light responsive
MS.gene88987.t1	G-Box	CACGTT	1763	6	Pisum sativum	light responsive
MS.gene88987.t1	CGTCA-motif	CGTCA	596	5	Hordeum vulgare	MeJA responsive
MS.gene88987.t1	TGACG-motif	TGACG	596	5	Hordeum vulgare	MeJA responsive
MS.gene88987.t1	LTR	CCGAAA	1653	6	Hordeum vulgare	low temperature responsive
MS.gene88987.t1	I-box	cCATATCCAAT	1684	10	Flaveria trinervia	drought responsive
MS.gene88987.t1	MRE	AACCTAA	133	7	Petroselinum crispum	drought responsive
MS.gene88987.t1	ABRE	ACGTG	1763	5	Arabidopsis thaliana	plant growth regulators
MS.gene88987.t1	MBS	CAACTG	382	6	Arabidopsis thaliana	drought responsive
MS.gene88987.t1	Box 4	ATTAAT	239	6	Petroselinum crispum	drought responsive
MS.gene88987.t1	Box 4	ATTAAT	1014	6	Petroselinum crispum	drought responsive
MS.gene88987.t1	G-box	TAAACGTG	1763	8	Brassica oleracea	light responsive
MS.gene95463.t1	LTR	CCGAAA	1146	6	Hordeum vulgare	low temperature responsive
MS.gene95463.t1	LTR	CCGAAA	1935	6	Hordeum vulgare	low temperature responsive
MS.gene95463.t1	TGACG-motif	TGACG	527	5	Hordeum vulgare	MeJA responsive
MS.gene95463.t1	CGTCA-motif	CGTCA	527	5	Hordeum vulgare	MeJA responsive
MS.gene95463.t1	GT1-motif	GGTTAA	1448	6	Arabidopsis thaliana	light responsive
MS.gene95463.t1	P-box	CCTTTTG	1087	7	Oryza sativa	plant growth regulators
MS.gene95463.t1	GATA-motif	GATAGGA	450	7	Arabidopsis thaliana	drought responsive
MS.gene95463.t1	GATA-motif	AAGATAAGATT	1509	10	Arabidopsis thaliana	drought responsive
MS.gene95463.t1	Box 4	ATTAAT	1542	6	Petroselinum crispum	drought responsive
MS.gene95463.t1	Box 4	ATTAAT	1671	6	Petroselinum crispum	drought responsive
MS.gene95463.t1	ARE	AAACCA	370	6	Zea mays	anaerobic induction
MS.gene95463.t1	ARE	AAACCA	821	6	Zea mays	anaerobic induction
MS.gene95463.t1	MRE	AACCTAA	94	7	Petroselinum crispum	drought responsive
MS.gene95463.t1	MRE	AACCTAA	687	7	Petroselinum crispum	drought responsive
MS.gene95463.t1	MRE	AACCTAA	692	7	Petroselinum crispum	drought responsive
MS.gene95463.t1	AE-box	AGAAACAA	1005	8	Arabidopsis thaliana	light responsive
MS.gene98031.t1	P-box	CCTTTTG	1236	7	Oryza sativa	plant growth regulators
MS.gene98031.t1	CGTCA-motif	CGTCA	1233	5	Hordeum vulgare	MeJA responsive
MS.gene98031.t1	CGTCA-motif	CGTCA	1506	5	Hordeum vulgare	MeJA responsive
MS.gene98031.t1	G-Box	CACGTT	1516	6	Pisum sativum	light responsive
MS.gene98031.t1	G-Box	CACGTT	1847	6	Pisum sativum	light responsive
MS.gene98031.t1	TGACG-motif	TGACG	1233	5	Hordeum vulgare	MeJA responsive
MS.gene98031.t1	TGACG-motif	TGACG	1506	5	Hordeum vulgare	MeJA responsive
MS.gene98031.t1	TCT-motif	TCTTAC	441	6	Arabidopsis thaliana	drought responsive
MS.gene98031.t1	TCT-motif	TCTTAC	1624	6	Arabidopsis thaliana	drought responsive
MS.gene98031.t1	GATA-motif	GATAGGA	1739	7	Arabidopsis thaliana	drought responsive
MS.gene98031.t1	TCA-element	CCATCTTTTT	251	9	Nicotiana tabacum	salicylic acid responsive
MS.gene98031.t1	TCA-element	TCAGAAGAGG	1625	9	Brassica oleracea	salicylic acid responsive
MS.gene98031.t1	ABRE	ACGTG	58	5	Arabidopsis thaliana	plant growth regulators
MS.gene98031.t1	ABRE	ACGTG	1517	5	Arabidopsis thaliana	plant growth regulators
MS.gene98031.t1	ABRE	ACGTG	1848	5	Arabidopsis thaliana	plant growth regulators
MS.gene98031.t1	G-box	CACGTC	58	6	Zea mays	light responsive
MS.gene98031.t1	Box 4	ATTAAT	1062	6	Petroselinum crispum	drought responsive
MS.gene98031.t1	Box 4	ATTAAT	1252	6	Petroselinum crispum	drought responsive
MS.gene98031.t1	Box 4	ATTAAT	1876	6	Petroselinum crispum	drought responsive
MS.gene98031.t1	ARE	AAACCA	364	6	Zea mays	anaerobic induction
MS.gene98031.t1	ARE	AAACCA	1331	6	Zea mays	anaerobic induction
MS.gene98031.t1	ARE	AAACCA	1947	6	Zea mays	anaerobic induction
MS.gene98283.t1	MBS	CAACTG	644	6	Arabidopsis thaliana	drought responsive
MS.gene98283.t1	ABRE	ACGTG	435	5	Arabidopsis thaliana	plant growth regulators
MS.gene98283.t1	G-box	TACGTG	434	6	Arabidopsis thaliana	light responsive
MS.gene98283.t1	Box 4	ATTAAT	962	6	Petroselinum crispum	drought responsive
MS.gene98283.t1	Box 4	ATTAAT	997	6	Petroselinum crispum	drought responsive
MS.gene98283.t1	Box 4	ATTAAT	1284	6	Petroselinum crispum	drought responsive
MS.gene98283.t1	Box 4	ATTAAT	1486	6	Petroselinum crispum	drought responsive
MS.gene98283.t1	Box 4	ATTAAT	1529	6	Petroselinum crispum	drought responsive
MS.gene98283.t1	ARE	AAACCA	1111	6	Zea mays	anaerobic induction
MS.gene98283.t1	ARE	AAACCA	1407	6	Zea mays	anaerobic induction
MS.gene98283.t1	AE-box	AGAAACAA	633	8	Arabidopsis thaliana	light responsive
MS.gene98283.t1	AE-box	AGAAACAA	893	8	Arabidopsis thaliana	light responsive
MS.gene98283.t1	AE-box	AGAAACAA	1291	8	Arabidopsis thaliana	light responsive
MS.gene98283.t1	P-box	CCTTTTG	720	7	Oryza sativa	plant growth regulators
MS.gene98283.t1	TGACG-motif	TGACG	400	5	Hordeum vulgare	MeJA responsive
MS.gene98283.t1	CGTCA-motif	CGTCA	400	5	Hordeum vulgare	MeJA responsive
MS.gene98283.t1	GATA-motif	GATAGGG	766	7	Pisum sativum	drought responsive
